# Supplementary material for: Variation in recombination frequency and distribution across eukaryotes: patterns and processes
Source: PubMed Central journal article supplement (PMC5698618; doi:10.1098/rstb.2016.0455), 2017-11-06
Supplement: rstb20160455supp2.pdf [file rstb20160455supp2.pdf]

| Ref          | year | species                |
|--------------|------|------------------------|
| Butcher      | 2000 | Acacia_mangium         |
| Sirvio       | 2011 | Acromyrmex_echinatior  |
| Wang         | 2009 | Acropora_millepora     |
| Scaglione    | 2015 | Actinidia_chinensis    |
| Hawthorne    | 2001 | Acyrtosiphon_pisum     |
| Juneja       | 2014 | Aedes_aegypti          |
| Sutherland   | 2011 | Aedes_albopictus       |
| Olivera      | 2013 | Aegilops_sharonensis   |
| Luo          | 2013 | Aegilops_tauschii      |
| Edae         | 2017 | Aegilops_umbellulata   |
| Foulogne-Ori | 2010 | Agaricus_bisporus      |
| Rotter       | 2009 | Agrostis_capillaris    |
| Honig        | 2014 | Agrostis_stolonifera   |
| Baldwin      | 2012 | Allium_cepa            |
| Maughan      | 2011 | Amaranthus_hybridus    |
| Smith        | 2005 | Ambystoma_tigrinum     |
| deSousa      | 2013 | Ananas_comosus         |
| Huang        | 2009 | Anas_platyrhynchos     |
| Kai          | 2014 | Anguilla_japonica      |
| Wondji       | 2007 | Anopheles_funestus     |
| Rondeau      | 2013 | Anoplopoma_fimbria     |
| Venkat       | 2014 | Anthurium_andreanum    |
| Shi          | 2013 | Apis_cerana            |
| Wilfert      | 2007 | Apis_mellifera         |
| Tian         | 2015 | Apostichopus_japonicus |
| Willems      | 2007 | Arabidopsis_halleri    |
| Singer       | 2015 | Arabidopsis_thaliana   |
| Nagy         | 2010 | Arachis_duranensis     |
| Zhou         | 2014 | Arachis_hypogaea       |
| Li           | 2012 | Argopecten_irradians   |
| Zhu          | 2014 | Aristichthys_nobilis   |
| DeVos        | 2013 | Artemia_franciscana    |
| Phan         | 2003 | Ascochyta_rabiei       |
| Christians   | 2011 | Aspergillus_nidulans   |
| Sanetra      | 2009 | Astatotilapia_burtoni  |
| Carlson      | 2015 | Astyanax_mexicanus     |
| Chaffin      | 2016 | Avena_sativa           |
| Sim          | 2017 | Bactrocera_cucurbitae  |
| Kuzina       | 2011 | Barbarea_vulgaris      |
| Brennan      | 2012 | Begonia_plebeja        |
| Laurent      | 2007 | Beta_vulgaris          |
| Jiang        | 2011 | Betula_pendula         |
| Beldade      | 2009 | Bicyclus_aynana        |
| Schnabel     | 2003 | Bison_bison            |

|            |      |                                  |
|------------|------|----------------------------------|
| VantHof    | 2013 | <i>Biston_betularia</i>          |
| Liu        | 2014 | <i>Boehmeria_nivea</i>           |
| Stolle     | 2011 | <i>Bombus_terrestris</i>         |
| Zhan       | 2009 | <i>Bombyx_mori</i>               |
| Ihara      | 2004 | <i>Bos_taurus</i>                |
| Holloway   | 2001 | <i>Bracon_hebetor</i>            |
| Cheng      | 2009 | <i>Brassica_campestris</i>       |
| Zou        | 2014 | <i>Brassica_carinata</i>         |
| Zou        | 2016 | <i>Brassica_junceae</i>          |
| Zhang      | 2016 | <i>Brassica_napus</i>            |
| Zhao       | 2016 | <i>Brassica_oleracea</i>         |
| Yu         | 2016 | <i>Brassica_rapa</i>             |
| Bohra      | 2012 | <i>Cajanus_cajan</i>             |
| Gehring    | 2006 | <i>Camelina_sativa</i>           |
| Taniguchi  | 2012 | <i>Camellia_sinensis</i>         |
| Wong       | 2010 | <i>Canis_lupus</i>               |
| Schibler   | 1998 | <i>Capra_hircus</i>              |
| Linde      | 2001 | <i>Capsella_bursa-pastoris</i>   |
| Han        | 2016 | <i>Capsicum_annuum</i>           |
| Lee        | 2016 | <i>Capsicum_baccatum</i>         |
| Kuang      | 2016 | <i>Carassius_auratus</i>         |
| Chen       | 2007 | <i>Carica_papaya</i>             |
| Bowers     | 2016 | <i>Carthamus_tinctorius</i>      |
| Kubisiak   | 2013 | <i>Castanea_mollissima</i>       |
| Sharma     | 2011 | <i>Catharanthus_roseus</i>       |
| Nakazato   | 2006 | <i>Ceratopteris_richardii</i>    |
| Maughan    | 2012 | <i>Chenopodium_quinoa</i>        |
| Chen       | 2010 | <i>Chimonanthus_praecox</i>      |
| Kathir     | 2003 | <i>Chlamydomonas_reinhardtii</i> |
| Zhan       | 2009 | <i>Chlamys_farreri</i>           |
| Gaur       | 2015 | <i>Cicer_arietinum</i>           |
| Kano       | 2007 | <i>Ciona_intestinalis</i>        |
| Hill       | 2008 | <i>Ciona_savignyi</i>            |
| Reddy      | 2014 | <i>Citrullus_lanatus</i>         |
| Ollitrault | 2012 | <i>Citrus_clementina</i>         |
| Guo        | 2015 | <i>Citrus_sinensis</i>           |
| Kaiser     | 2012 | <i>Clunio_marinus</i>            |
| Riedel     | 2009 | <i>Cocos_nucifera</i>            |
| Moncada    | 2016 | <i>Coffea_arabica</i>            |
| Muraguchi  | 2003 | <i>Coprinus_cinereus</i>         |
| Biswass    | 2015 | <i>Corchorus_capsularis</i>      |
| Kundu      | 2015 | <i>Corchorus_olitorius</i>       |
| Gagnaire   | 2013 | <i>Coregonus_clupeaformis</i>    |
| Wang       | 2009 | <i>Cornus_florida</i>            |
| Kikuchi    | 2005 | <i>Coturnix_japonica</i>         |

|               |      |                                 |
|---------------|------|---------------------------------|
| Hedgecock     | 2015 | <i>Crassostrea_gigas</i>        |
| Yu            | 2003 | <i>Crassostrea_virginica</i>    |
| Miles         | 2009 | <i>Crocodylus_porosus</i>       |
| Marra         | 2004 | <i>Cryptococcus_neoformans</i>  |
| Moriguchi     | 2016 | <i>Cryptomeria_japonica</i>     |
| Xia           | 2010 | <i>Ctenopharyngodon_idella</i>  |
| Diaz          | 2011 | <i>Cucumis_melo</i>             |
| Zhu           | 2016 | <i>Cucumis_sativus</i>          |
| Zhang         | 2015 | <i>Cucurbita_maxima</i>         |
| Gong          | 2008 | <i>Cucurbita_moschata</i>       |
| Montero-Pau   | 2017 | <i>Cucurbita_pepo</i>           |
| Hickner       | 2013 | <i>Culex_pipiens</i>            |
| Hansson       | 2010 | <i>Cyanistes_caeruleus</i>      |
| Portis        | 2009 | <i>Cynara_cardunculus</i>       |
| Harris-Shultz | 2010 | <i>Cynodon_dactylon</i>         |
| Song          | 2012 | <i>Cynoglossus_semilaevis</i>   |
| Zhao          | 2013 | <i>Cyprinus_carpio</i>          |
| Zhao          | 2016 | <i>Dactylis_glomerata</i>       |
| Bradley       | 2011 | <i>Danio_rerio</i>              |
| Dukic         | 2016 | <i>Daphnia_magna</i>            |
| Cristescu     | 2006 | <i>Daphnia_pulex</i>            |
| Cavagnaro     | 2014 | <i>Daucus_carota</i>            |
| Yagi          | 2013 | <i>Dianthus_caryophyllus</i>    |
| Chistiakov    | 2008 | <i>Dicentrarchus_labrax</i>     |
| Stocker       | 2012 | <i>Drosophila_serrata</i>       |
| Heesch        | 2010 | <i>Ectocarpus_siliculosus</i>   |
| Blake         | 2011 | <i>Eimeria_maxima</i>           |
| Shirley       | 2000 | <i>Eimeria_tenella</i>          |
| Ting          | 2016 | <i>Elaeis_guineensis</i>        |
| Montoya       | 2013 | <i>Elaeis_oleifera</i>          |
| Mott          | 2011 | <i>Elymus_lanceolatus</i>       |
| Dor           | 2014 | <i>Epinephelus_aeneus</i>       |
| Swinburne     | 2006 | <i>Equus_caballus</i>           |
| Zheng         | 2013 | <i>Eremochloa_ophiuroides</i>   |
| Fukuda        | 2016 | <i>Eriobotrya_japonica</i>      |
| Cui           | 2015 | <i>Eriocheir_sinensis</i>       |
| RONDEAU       | 2014 | <i>Esox_lucius</i>              |
| Agrama        | 2002 | <i>Eucalyptus_camaldulensis</i> |
| Hudson        | 2012 | <i>Eucalyptus_grandis</i>       |
| Li            | 2015 | <i>Eucalyptus_tereticornis</i>  |
| Li            | 2015 | <i>Eucalyptus_urophylla</i>     |
| Li            | 2014 | <i>Eucommia_ulmoides</i>        |
| Yabe          | 2014 | <i>Fagopyrum_esculentum</i>     |
| Li            | 2016 | <i>Felis_silvestris</i>         |
| Wang          | 2012 | <i>Fenneropenaeus_chinensis</i> |

|              |      |                                    |
|--------------|------|------------------------------------|
| Dierking     | 2015 | <i>Festuca_arundinacea</i>         |
| Backstrom    | 2008 | <i>Ficedula_albicollis</i>         |
| Mahoney      | 2016 | <i>Fragaria_iinumae</i>            |
| Davik        | 2015 | <i>Fragaria_vesca</i>              |
| Sargent      | 2016 | <i>Fragaria_xananassa</i>          |
| DeVos        | 2007 | <i>Fusarium_circinatum</i>         |
| Lee          | 2008 | <i>Fusarium_graminearum</i>        |
| Teunissen    | 2003 | <i>Fusarium_oxysporum</i>          |
| Jurgenson    | 2002 | <i>Fusarium_verticillioides</i>    |
| Hubert       | 2010 | <i>Gadus_morhua</i>                |
| Pengelly     | 2016 | <i>Gallus_gallus</i>               |
| Rastas       | 2016 | <i>Gasterosteus_aculeatus</i>      |
| Nakatsuka    | 2012 | <i>Gentiana_scabra</i>             |
| vanderVoort  | 1999 | <i>Globodera_rostochiensis</i>     |
| Song         | 2016 | <i>Glycine_max</i>                 |
| Shi          | 2016 | <i>Gossypium_barbadense</i>        |
| Jia          | 2016 | <i>Gossypium_hirsutum</i>          |
| Wang         | 2013 | <i>Gossypium_raimondii</i>         |
| Hou          | 2013 | <i>Gossypium_tomentosum</i>        |
| Ren          | 2016 | <i>Haliotis_diversicolor</i>       |
| Vervalle     | 2013 | <i>Haliotis_midae</i>              |
| Henning      | 2017 | <i>Haplochromis_chilotes</i>       |
| Henning      | 2014 | <i>Haplochromis_sauvagei</i>       |
| Celik        | 2016 | <i>Helianthus_annuus</i>           |
| Davey        | 2016 | <i>Heliconius_melpomene</i>        |
| Atibalentja  | 2005 | <i>Heterodera_glycines</i>         |
| Shearman     | 2015 | <i>Hevea_brasiliensis</i>          |
| Chen         | 2011 | <i>Hibiscus_cannabinus</i>         |
| Shirasawa    | 2015 | <i>Hieracium_</i>                  |
| Palaiokostas | 2013 | <i>Hippoglossus_hippoglossus</i>   |
| Zhou         | 2016 | <i>Hordeum_vulgare</i>             |
| Henning      | 2015 | <i>Humulus_lupulus</i>             |
| Brelsford    | 2016 | <i>Hyla_aborea</i>                 |
| Guo          | 2013 | <i>Hypophthalmichthys_molitrix</i> |
| Bai          | 2016 | <i>Hyriopsis_cumingii</i>          |
| Liu          | 2016 | <i>Ictalurus_punctatus</i>         |
| Zhao         | 2013 | <i>Ipomoea_batatas</i>             |
| Ullmann      | 2003 | <i>Ixodes_scapularis</i>           |
| Wu           | 2015 | <i>Jatropha_curcas</i>             |
| Zhu          | 2015 | <i>Juglans_regia</i>               |
| Kanomori     | 2016 | <i>Kryptolebias_marmoratus</i>     |
| Robinson     | 2014 | <i>Labeo_rohita</i>                |
| Truco        | 2013 | <i>Lactuca_sativa</i>              |
| Ao           | 2015 | <i>Larimichthys_crocea</i>         |
| Guan         | 2011 | <i>Larix_kaempferi</i>             |

|             |      |                            |
|-------------|------|----------------------------|
| Wang        | 2017 | Lates_calcarifer           |
| Sudheesh    | 2016 | Lens_culinaris             |
| Wang        | 2010 | Lepomis_macrochirus        |
| Hawthorne   | 2001 | Leptinotarsa_decemlineata  |
| Cloutier    | 2012 | Linum_usitatissimum        |
| Yu          | 2015 | Litopenaeus_vannamei       |
| Guan        | 2014 | Lolium_multiflorum         |
| Velmurugan  | 2016 | Lolium_perenne             |
| Wang        | 2008 | Lotus_japonicus            |
| Berdan      | 2014 | Lucania_goodei             |
| Berdan      | 2014 | Lucania_parva              |
| Wu          | 2016 | Luffa_acutangula           |
| Vipin       | 2013 | Lupinus_albus              |
| Yang        | 2013 | Lupinus_angustifolius      |
| Rogers      | 2006 | Macaca_mulatta             |
| Wang        | 2011 | Macropus_eugenii           |
| Zheng       | 2008 | Magnaporthe_grisea         |
| DiPierro    | 2016 | Malus_domestica            |
| Liu         | 2016 | Malus_sieversii            |
| Clark       | 2014 | Malus_pumila               |
| Luo         | 2016 | Mangifera_indica           |
| Alaba       | 2015 | Manihot_esculenta          |
| Lu          | 2016 | Marsupenaeus_japonicus     |
| Li          | 2014 | Medicago_sativa            |
| Gorton      | 2012 | Medicago_truncatula        |
| Anderson    | 2016 | Melampsora lini            |
| Aslam       | 2010 | Meleagris_gallopavo        |
| Thomas      | 2012 | Meloidogyne_hapla          |
| Nietlisbach | 2015 | Melospiza_melodia          |
| O'Quin      | 2013 | Metriaclima_zebra          |
| McGraw      | 2011 | Microtus_ochrogaster       |
| Holeski     | 2014 | Mimulus_guttatus           |
| Liu         | 2016 | Miscanthus_sinensis        |
| Morishima   | 2008 | Misgurnus_anguillicaudatus |
| Samollow    | 2007 | Monodelphis_domestica      |
| Hipplyte    | 2010 | Musa_acuminata             |
| Kema        | 2002 | Mycosphaerella_graminicola |
| Diao        | 2016 | Nasonia_giraulti           |
| Zhang       | 2014 | Nelumbo_lutea              |
| Liu         | 2016 | Nelumbo_nucifera           |
| Zhang       | 2012 | Nicotiana_langsdorffii     |
| Gong        | 2016 | Nicotiana_tabacum          |
| Jairin      | 2013 | Nilaparvata_lugens         |
| Kirschner   | 2012 | Nothobranchius_furzeri     |
| Ipek        | 2016 | Olea_europaea              |

|             |      |                            |
|-------------|------|----------------------------|
| McClelland  | 2008 | Oncorhynchus_kisutch       |
| Guyomard    | 2012 | Oncorhynchus_mykiss        |
| Larson      | 2016 | Oncorhynchus_nerka         |
| McKinney    | 2016 | Oncorhynchus_tshawytscha   |
| Liu         | 2013 | Oreochromis_mossambicus    |
| Kocher      | 1998 | Oreochromis_niloticus      |
| Sternstein  | 2015 | Oryctolagus_cuniculus      |
| Luo         | 2016 | Oryza_rufipogon            |
| DeLeon      | 2016 | Oryza_sativa               |
| Harrang     | 2015 | Ostrea_edulis              |
| Johnston    | 2017 | Ovis_aries                 |
| Poissant    | 2010 | Ovis_canadensis            |
| Liu         | 2012 | Panicum_virgatum           |
| Winter      | 2010 | Papilio_glaucus            |
| Rogers      | 2006 | Papio_hamadryas            |
| Song        | 2012 | Paralichthys_olivaceus     |
| vanOers     | 2014 | Parus_major                |
| Wang        | 2017 | Patinopecten_yessoensis    |
| Baranski    | 2014 | Penaeus_monodon            |
| Punnuri     | 2016 | Pennisetum_glaucum         |
| Kenney-Hunt | 2014 | Peromyscus_maniculatus     |
| Borrone     | 2009 | Persea_americana           |
| Bossolini   | 2011 | Petunia_axillaris          |
| Malkus      | 2009 | Phaeosphaeria_nodorum      |
| Gutierrez   | 2011 | Phalloceros_caudimaculatus |
| Song        | 2015 | Phaseolus_vulgaris         |
| Mathew      | 2014 | Phoenix_dactylifera        |
| Kamisugi    | 2008 | Physcomitrella_patens      |
| vanderLee   | 2004 | Phytophthora_infestans     |
| Lind        | 2014 | Picea_abies                |
| Friesline   | 2015 | Pinus_balfouriana          |
| Yang        | 2013 | Pinus_elliottii            |
| Chen        | 2010 | Pinus_koraiensis           |
| Jermstad    | 2011 | Pinus_lambertiana          |
| Chen        | 2014 | Pinus_massoniana           |
| Chancerel   | 2013 | Pinus_pinaster             |
| Moraga-Suaz | 2014 | Pinus_radiata              |
| Westbrook   | 2015 | Pinus_taeda                |
| Boutet      | 2016 | Pisum_sativum              |
| Martinello  | 2005 | Plasmodium_chabaudi        |
| Jiang       | 2011 | Plasmodium_falciparum      |
| Tripathi    | 2009 | Poecilia_reticulata        |
| Sirvio      | 2011 | Pogonomyrmex_rugosus       |
| Wang        | 2010 | Populus_adenopoda          |
| Paolucci    | 2010 | Populus_alba               |

|              |      |                                   |
|--------------|------|-----------------------------------|
| Mousavi      | 2016 | <i>Populus_deltoides</i>          |
| Gaudet       | 2008 | <i>Populus_nigra</i>              |
| Pakull       | 2009 | <i>Populus_tremula</i>            |
| Liu          | 2012 | <i>Portunus_trituberculatus</i>   |
| Feng         | 2016 | <i>Primulina_eburnea</i>          |
| Srinivasan   | 2002 | <i>Pristionchus_pacificus</i>     |
| Lalli        | 2008 | <i>Prunus_armeniaca</i>           |
| Wang         | 2015 | <i>Prunus_avium</i>               |
| Tavassolian  | 2010 | <i>Prunus_dulcis</i>              |
| Cao          | 2011 | <i>Prunus_kansuensis</i>          |
| Zhang        | 2015 | <i>Prunus_mume</i>                |
| Nunez-Lillo  | 2015 | <i>Prunus_persica</i>             |
| Arango_Isaza | 2016 | <i>Pseudocercospora_fijiensis</i> |
| Harel-Beja   | 2015 | <i>Punica_granatum</i>            |
| Wu           | 2014 | <i>Pyrus_communis</i>             |
| Bodenes      | 2016 | <i>Quercus_</i>                   |
| Cano         | 2011 | <i>Rana_temporaria</i>            |
| Mun          | 2015 | <i>Raphanus_sativus</i>           |
| Steen        | 1999 | <i>Rattus_norvegicus</i>          |
| Schlipallus  | 2002 | <i>Rhizopertha_dominica</i>       |
| Rukam        | 2016 | <i>Ricinus_communis</i>           |
| Ward         | 2013 | <i>Rubus_idaeus</i>               |
| Bushakra     | 2012 | <i>Rubus_occidentalis</i>         |
| Nie          | 2017 | <i>Ruditapes_philippinarum</i>    |
| Zhang        | 2015 | <i>Saccharina_japonica</i>        |
| Tsai         | 2016 | <i>Salmo_salar</i>                |
| Leitwein     | 2017 | <i>Salmo_trutta</i>               |
| Liu          | 2016 | <i>Salvia_miltiorrhiza</i>        |
| Criscione    | 2009 | <i>Schistosoma_mansoni</i>        |
| Hollenbeck   | 2015 | <i>Sciaenops_ocellatus</i>        |
| Shen         | 2014 | <i>Scleropages_formosus</i>       |
| Wang         | 2015 | <i>Scophthalmus_maximus</i>       |
| Ma           | 2016 | <i>Scylla_paramamosain</i>        |
| Milczarski   | 2015 | <i>Secale_cereale</i>             |
| Aoki         | 2015 | <i>Seriola_quinqueradiata</i>     |
| Zhang        | 2016 | <i>Sesamum_indicum</i>            |
| Fang         | 2016 | <i>Setaria_italica</i>            |
| Bergero      | 2013 | <i>Silene_latifolia</i>           |
| Javidfar     | 2013 | <i>Sinapis_alba</i>               |
| Viquez-Zamo  | 2014 | <i>Solanum_lycopersicum</i>       |
| Fukuoka      | 2012 | <i>Solanum_melongena</i>          |
| vandenOever  | 2016 | <i>Solanum_pennellii</i>          |
| Chen         | 2014 | <i>Solanum_pimpinellifolium</i>   |
| Endelman     | 2016 | <i>Solanum_tuberosum</i>          |
| Ji           | 2017 | <i>Sorghum_bicolor</i>            |

|               |      |                               |
|---------------|------|-------------------------------|
| Palaiokostas  | 2016 | <i>Sparus_aurata</i>          |
| Chan-Navarro  | 2016 | <i>Spinacia_oleracea</i>      |
| Nemetschke    | 2010 | <i>Strongyloides_ratti</i>    |
| Tortereau     | 2012 | <i>Sus_scrofa</i>             |
| Backstrom     | 2010 | <i>Taeniopygia_guttata</i>    |
| Kai           | 2005 | <i>Takifugu_rubripes</i>      |
| Arias         | 2016 | <i>Taraxacum_koksaghyz</i>    |
| Royaert       | 2016 | <i>Theobroma_cacao</i>        |
| Uchino        | 2016 | <i>Thunnus_orientalis</i>     |
| Foley         | 2011 | <i>Tigriopus_californicus</i> |
| Lorenzen      | 2005 | <i>Tribolium_castaneum</i>    |
| Yezerski      | 2003 | <i>Tribolium_confusum</i>     |
| Laurent       | 1998 | <i>Trichogramma_brassicae</i> |
| Hirakawa      | 2016 | <i>Trifolium_pratense</i>     |
| Griffiths     | 2013 | <i>Trifolium_repens</i>       |
| Ghamkhar      | 2012 | <i>Trifolium_subterraneum</i> |
| Zhai          | 2016 | <i>Triticum_aestivum</i>      |
| MacLeod       | 2005 | <i>Trypanosoma_brucei</i>     |
| Shan          | 2015 | <i>Undaria_pinnatifida</i>    |
| McCallum      | 2016 | <i>Vaccinium_corymbosum</i>   |
| Covarrubias-I | 2016 | <i>Vaccinium_macrocarpon</i>  |
| Lepers-Andrz  | 2012 | <i>Vanilla_tahitensis</i>     |
| Sirvio        | 2011 | <i>Vespula_vulgaris</i>       |
| Kaur          | 2014 | <i>Vicia_faba</i>             |
| Liu           | 2016 | <i>Vigna_angularis</i>        |
| Gupta         | 2008 | <i>Vigna_mungo</i>            |
| Wang          | 2016 | <i>Vigna_radiata</i>          |
| Kongjaimun    | 2012 | <i>Vigna_unguiculata</i>      |
| Marubodee     | 2015 | <i>Vigna_vexillata</i>        |
| Liu           | 2013 | <i>Vitis_amurensis</i>        |
| Zhang         | 2009 | <i>Vitis_cinerea</i>          |
| Guo           | 2015 | <i>Vitis_vinifera</i>         |
| Wells         | 2011 | <i>Xenopus_tropicalis</i>     |
| Amores        | 2014 | <i>Xiphophorus_maculatus</i>  |
| Zhou          | 2016 | <i>Zea_mays</i>               |
| Zhang         | 2016 | <i>Ziziphus_jujuba</i>        |
| Wang          | 2015 | <i>Zoysia_japonica</i>        |
| Huang         | 2016 | <i>Zoysia_matrella</i>        |
| Lendenmann    | 2014 | <i>Zymoseptoria_tritici</i>   |



| speciesOTT                         | Group   | par.path | Genome Size |
|------------------------------------|---------|----------|-------------|
| Acacia_mangium_ott444202           | Plants  | n        | 635.7       |
| Acromyrmex_echinator_ott735589     | Animals | n        | 335         |
| Acropora_millepora_ott5908120      | Animals | n        | 420         |
| Actinidia_chinensis_ott279981      | Plants  | n        | 1408.32     |
| Acyrtosiphon_pisum_ott814484       | Animals | n        | 165         |
| Aedes_aegypti_ott269666            | Animals | n        | 942.14      |
| Aedes_albopictus_ott793181         | Animals | n        | 1090.47     |
| Aegilops_sharonensis_ott327444     | Plants  | n        | 6894.9      |
| Aegilops_tauschii_ott881533        | Plants  | n        | 4327.21     |
| Aegilops_umbellulata_ott790374     | Plants  | n        | 4938.9      |
| Agaricus_bisporus_ott564405        | Fungi   | n        | 30.2337     |
| Agrostis_capillaris_ott550221      | Plants  | n        | 4000.02     |
| Agrostis_stolonifera_ott307879     | Plants  | n        | 3423        |
| Allium_cepa_ott781600              | Plants  | n        | 16381.5     |
| Amaranthus_hybridus_ott317810      | Plants  | n        | 616.14      |
| Ambystoma_tigrinum_ott1092552      | Animals | n        | 30875.46    |
| Ananas_comosus_ott627039           | Plants  | n        | 537.9       |
| Anas_platyrhynchos_ott765167       | Animals | n        | 1375.72     |
| Anguilla_japonica_ott854198        | Animals | n        | 1151.14     |
| Anopheles_funestus_ott286257       | Animals | n        | 225.224     |
| Anoplopoma_fimbria_ott441856       | Animals | n        | 757.95      |
| Anthurium_longicaudatum_ott3999674 | Plants  | n        | 4694.4      |
| Apis_cerana_ott625771              | Animals | n        | 185.82      |
| Apis_mellifera_ott461645           | Animals | n        | 229.83      |
| Apostichopus_japonicus_ott721060   | Animals | n        | 664.37      |
| Arabidopsis_halleri_ott152273      | Plants  | n        | 234.72      |
| Arabidopsis_thaliana_ott309263     | Plants  | n        | 123.5       |
| Arachis_duranensis_ott607569       | Plants  | n        | 1242.06     |
| Arachis_hypogaea_ott39541          | Plants  | n        | 2806.86     |
| Argopecten_irradians_ott6370122    | Animals | n        | 1173.6      |
| Argopecten_irradians_ott887220     | Animals | n        | 865.53      |
| Artemia_franciscana_ott59094       | Animals | n        | 948.66      |
| Didymella_rabiei_ott5712886        | Fungi   | y        | 34.6583     |
| Aspergillus_nidulans_ott117339     | Fungi   | n        | 30.2427     |
| Astatotilapia_ott710024            | Animals | n        | 948.66      |
| Astyanax_mexicanus_ott701518       | Animals | n        | 1191.24     |
| Avena_sativa_ott790381             | Plants  | n        | 12938.94    |
| Bactrocera_cucurbitae_ott227727    | Animals | n        | 373         |
| Barbarea_vulgaris_ott35910         | Plants  | n        | 167.352     |
| Begonia_plebeja_ott434483          | Plants  | n        | 616.14      |
| Beta_vulgaris_ott273185            | Plants  | n        | 1222.5      |
| Betula_pendula_ott267719           | Plants  | n        | 1369.2      |
| Mycalesis_anyana_ott3108421        | Animals | n        | 479.22      |
| Bison_bison_ott907693              | Animals | n        | 4792.2      |

|                                               |         |   |          |
|-----------------------------------------------|---------|---|----------|
| <i>Biston_betularia_ott968114</i>             | Animals | n | 500      |
| <i>Boehmeria_nivea_ott594991</i>              | Plants  | n | 716      |
| <i>Bombus_terrestris_ott161197</i>            | Animals | n | 518.34   |
| <i>Bombyx_mori_ott440274</i>                  | Animals | n | 513.45   |
| <i>Bos_taurus_ott490099</i>                   | Animals | n | 3537.1   |
| <i>Bracon_brevicornis_ott3293364</i>          | Animals | y | 165      |
| <i>Brassica_rapa_subsp_oleifera_ott240937</i> | Plants  | n | 567.24   |
| <i>Brassica_carinata_ott749459</i>            | Plants  | n | 1545.24  |
| <i>Brassica_junceae_ott309279</i>             | Plants  | n | 1496.34  |
| <i>Brassica_napus_ott309234</i>               | Plants  | n | 1124.7   |
| <i>Brassica_oleracea_ott833642</i>            | Plants  | n | 762.8    |
| <i>Brassica_rapa_ott833632</i>                | Plants  | n | 782.4    |
| <i>Cajanus_cajan_ott612448</i>                | Plants  | n | 860.64   |
| <i>Camelina_sativa_ott776348</i>              | Plants  | n | 641.356  |
| <i>Camellia_sinensis_ott1058509</i>           | Plants  | n | 3814.2   |
| <i>Canis_lupus_ott247341</i>                  | Animals | n | 2748.18  |
| <i>Capra_hircus_ott19017</i>                  | Animals | n | 3168.72  |
| <i>Capsella_bursa_pastoris_ott833644</i>      | Plants  | n | 391.2    |
| <i>Capsicum_annuum_ott473836</i>              | Plants  | n | 3090.48  |
| <i>Capsicum_baccatum_ott232458</i>            | Plants  | n | 3628.38  |
| <i>Carassius_auratus_ott1005907</i>           | Animals | n | 1643.04  |
| <i>Carica_papaya_ott429474</i>                | Plants  | n | 372      |
| <i>Carthamus_tinctorius_ott1061541</i>        | Plants  | n | 1369.2   |
| <i>Castanea_mollissima_ott540978</i>          | Plants  | n | 833.241  |
| <i>Catharanthus_roseus_ott524094</i>          | Plants  | n | 2376.5   |
| <i>Ceratopteris_cornuta_ott609865</i>         | Plants  | n | 11294    |
| <i>Chenopodium_quinoa_ott117198</i>           | Plants  | n | 1447.44  |
| <i>Chimonanthus_praecox_ott324777</i>         | Plants  | n | 600      |
| <i>Chlamydomonas_reinhardtii_ott33153</i>     | Plants  | n | 120.405  |
| <i>Notochlamys_hexactes_ott100122</i>         | Animals | n | 1244.016 |
| <i>Cicer_arietinum_ott612429</i>              | Plants  | n | 929.1    |
| <i>Ciona_intestinalis_ott744224</i>           | Animals | n | 150      |
| <i>Ciona_savignyi_ott677382</i>               | Animals | n | 170      |
| <i>Citrullus_lanatus_ott1006251</i>           | Plants  | n | 440.1    |
| <i>Citrus_aurantium_ott3942423</i>            | Plants  | n | 301.365  |
| <i>Citrus_sinensis_ott3942433</i>             | Plants  | n | 490.956  |
| <i>Clunio_marinus_ott192116</i>               | Animals | n | 95       |
| <i>Cocos_nucifera_ott366250</i>               | Plants  | n | 3107.106 |
| <i>Coffea_arabica_ott1001050</i>              | Plants  | n | 1173.6   |
| <i>Coprinopsis_cinerea_ott737441</i>          | Fungi   | n | 37.5     |
| <i>Corchorus_capsularis_ott679189</i>         | Plants  | n | 586.8    |
| <i>Corchorus_olitorius_ott578269</i>          | Plants  | n | 909.54   |
| <i>Coregonus_clupeaformis_ott629345</i>       | Animals | n | 2386.32  |
| <i>Cornus_florida_ott148264</i>               | Plants  | n | 1545.24  |
| <i>Coturnix_japonica_ott803622</i>            | Animals | n | 1320.3   |

|                                    |         |   |            |
|------------------------------------|---------|---|------------|
| Crassostrea_gigas_ott987409        | Animals | n | 557.736    |
| Crassostrea_virginica_ott365708    | Animals | n | 675        |
| Crocodylus_porosus_ott35872        | Animals | n | 2049.54    |
| Cryptococcus_neoformans_ott48333   | Fungi   | y | 19.0519    |
| Cryptomeria_japonica_ott620749     | Plants  | n | 10758      |
| Ctenopharyngodon_idella_ott1005936 | Animals | n | 1004.54571 |
| Cucumis_melo_ott1006256            | Plants  | n | 929.1      |
| Cucumis_sativus_ott1006246         | Plants  | n | 195.669    |
| Cucurbita_maxima_ott379272         | Plants  | n | 449.88     |
| Cucurbita_moschata_ott84409        | Plants  | n | 420.54     |
| Cucurbita_pepo_ott379282           | Plants  | n | 537.9      |
| Culex_pipiens_ott218684            | Animals | n | 684.6      |
| Cyanistes_caeruleus_ott746120      | Animals | n | 1437.66    |
| Cynara_cardunculus_ott991885       | Plants  | n | 1075.8     |
| Cynodon_dactylon_ott927435         | Plants  | n | 1110.03    |
| Cynoglossus_semilaevis_ott906506   | Animals | n | 606.36     |
| Cyprinus_carpio_ott429083          | Animals | n | 1741.9158  |
| Dactylis_glomerata_ott83469        | Plants  | n | 4303.2     |
| Danio_rerio_ott1005914             | Animals | n | 1817.124   |
| Daphnia_magna_ott668392            | Animals | n | 129.543    |
| Daphnia_pulex_ott59086             | Animals | n | 197.206    |
| Daucus_carota_ott372836            | Plants  | n | 421.539    |
| Dianthus_caryophyllus_ott842200    | Plants  | n | 616.14     |
| Dicentrarchus_labrax_ott3549       | Animals | n | 762.84     |
| Drosophila_serrata_ott86632        | Animals | n | 205.38     |
| Ectocarpus_siliculosus_ott878345   | SAR     | n | 195.811    |
| Eimeria_maxima_ott775254           | SAR     | y | 45.9751    |
| Eimeria_tenella_ott775246          | SAR     | y | 51.8944    |
| Elaeis_guineensis_ott947656        | Plants  | n | 1535.18    |
| Elaeis_oleifera_ott210313          | Plants  | n | 1402.73    |
| Elymus_lanceolatus_ott173152       | Plants  | n | 8244.54    |
| Epinephelus_aeneus_ott306171       | Animals | n | 1075.8     |
| Equus_caballus_ott1068218          | Animals | n | 3149.16    |
| Eremochloa_ophiuroides_ott843929   | Plants  | n | 811.74     |
| Eriobotrya_japonica_ott207983      | Plants  | n | 762.84     |
| Eriocheir_sinensis_ott566723       | Animals | n | 1680       |
| Esox_lucius_ott739941              | Animals | n | 1095.36    |
| Eucalyptus_camaldulensis_ott505234 | Plants  | n | 606.36     |
| Eucalyptus_grandis_ott40959        | Plants  | n | 591.5922   |
| Eucalyptus_tereticornis_ott173799  | Plants  | n | 586.8      |
| Eucalyptus_urophylla_ott1049231    | Plants  | n | 595.602    |
| Eucommia_ulmoides_ott743836        | Plants  | n | 723.72     |
| Fagopyrum_esculentum_ott904381     | Plants  | n | 1359.4     |
| Felis_silvestris_ott563163         | Animals | n | 2894.88    |
| Festuca_arundinacea_ott105576      | Animals | n | 1660       |

|                                                         |         |   |          |
|---------------------------------------------------------|---------|---|----------|
| <i>Festuca_rubra_ott202297</i>                          | Plants  | n | 4185.84  |
| <i>Ficedula_albicollis_ott107840</i>                    | Animals | n | 1118.34  |
| <i>Fragaria_iinumae_ott555467</i>                       | Plants  | n | 199.628  |
| <i>Fragaria_vesca_ott852873</i>                         | Plants  | n | 214.373  |
| <i>Fusarium_circinatum_FSP_34_ott75556</i>              | Plants  | n | 697.762  |
| <i>Fusarium_graminearum_CS3005_ott5726284</i>           | Fungi   | y | 43.9486  |
| <i>Fusarium_verticillioides_7600_ott966934</i>          | Fungi   | y | 36.458   |
| <i>Fusarium_oxysporum_f.sp._conglutinans_ott5481360</i> | Fungi   | n | 61.3869  |
| <i>Fusarium_verticillioides_ott966934</i>               | Fungi   | y | 41.8449  |
| <i>Gadus_morhua_ott114170</i>                           | Animals | n | 909.54   |
| <i>Gallus_gallus_ott153563</i>                          | Animals | n | 1230.26  |
| <i>Gasterosteus_aculeatus_ott401066</i>                 | Animals | n | 625.92   |
| <i>Gentiana_scabra_ott717875</i>                        | Plants  | n | 5000     |
| <i>Globodera_rostochiensis_ott232963</i>                | Animals | y | 95.8763  |
| <i>Glycine_max_ott681762</i>                            | Plants  | n | 1105.14  |
| <i>Gossypium_barbadense_ott854476</i>                   | Plants  | n | 2694.39  |
| <i>Gossypium_hirsutum_ott854480</i>                     | Plants  | n | 2347.2   |
| <i>Gossypium_raimondii_ott79347</i>                     | Plants  | n | 1101.228 |
| <i>Gossypium_tomentosum_ott733231</i>                   | Plants  | n | 2386.32  |
| <i>Haliotis_diversicolor_ott780542</i>                  | Animals | n | 1418.1   |
| <i>Haliotis_midiae_ott780532</i>                        | Animals | n | 1398.54  |
| <i>Haplochromis_chilotes_ott138490</i>                  | Animals | n | 1075.8   |
| <i>Haplochromis_sauvagei_ott685068</i>                  | Animals | n | 1075.8   |
| <i>Helianthus_annuus_ott515712</i>                      | Plants  | n | 2376.54  |
| <i>Heliconius_melpomene_ott896444</i>                   | Animals | n | 293.4    |
| <i>Heterodera_glycines_ott332065</i>                    | Animals | y | 81.908   |
| <i>Hevea_brasiliensis_ott339361</i>                     | Plants  | n | 2102.7   |
| <i>Hibiscus_cannabinus_ott393745</i>                    | Plants  | n | 1496.34  |
| <i>Hieracium_mixtum_ott711719</i>                       | Plants  | n | 4058.7   |
| <i>Hippoglossus_hippoglossus_ott408328</i>              | Animals | n | 713.94   |
| <i>Hordeum_vulgare_ott657948</i>                        | Plants  | n | 5418.1   |
| <i>Humulus_lupulus_ott84020</i>                         | Plants  | n | 2836.2   |
| <i>Hyla_arborea_ott677266</i>                           | Animals | n | 4649.69  |
| <i>Hypophthalmichthys_molitrix_ott35786</i>             | Animals | n | 978      |
| <i>Hyriopsis_cumingii_ott351029</i>                     | Animals | n | 3000     |
| <i>Ictalurus_punctatus_ott701523</i>                    | Animals | n | 993.648  |
| <i>Ipomoea_batatas_ott1071040</i>                       | Plants  | n | 1833.75  |
| <i>Ixodes_scapularis_ott621065</i>                      | Animals | n | 1765.38  |
| <i>Jatropha_curcas_ott916001</i>                        | Plants  | n | 420.54   |
| <i>Juglans_regia_ott138717</i>                          | Plants  | n | 606.36   |
| <i>Kryptolebias_marmoratus_ott229709</i>                | Animals | n | 680.367  |
| <i>Labeo_rohita_ott160616</i>                           | Animals | n | 1950     |
| <i>Lactuca_sativa_ott515700</i>                         | Plants  | n | 2591.7   |
| <i>Larimichthys_crocea_ott679823</i>                    | Animals | n | 678.938  |
| <i>Larix_kaempferi_ott154040</i>                        | Plants  | n | 9291     |

|                                       |         |   |            |
|---------------------------------------|---------|---|------------|
| Lates_calcarifer_ott6362446           | Animals | n | 684.6      |
| Lens_culinaris_ott156245              | Plants  | n | 4107.6     |
| Lepomis_macrochirus_ott836783         | Animals | n | 987.78     |
| Leptinotarsa_decemlineata_ott185597   | Animals | n | 449.88     |
| Linum_usitatissimum_ott1000262        | Plants  | n | 684.6      |
| Penaeus_vannamei_ott169168            | Animals | n | 2640       |
| Lolium_multiflorum_ott135777          | Plants  | n | 2660.16    |
| Lolium_perenne_ott135774              | Plants  | n | 2365.782   |
| Lotus_japonicus_ott1081728            | Plants  | n | 469.44     |
| Lucania_goodei_ott84261               | Animals | n | 1319.322   |
| Lucania_parva_ott839518               | Animals | n | 1391.694   |
| Luffa_acutangula_ott565719            | Plants  | n | 831.3      |
| Lupinus_albus_ott1030424              | Plants  | n | 586.8      |
| Lupinus_angustifolius_ott1030433      | Plants  | n | 1153       |
| Macaca_mulatta_ott689650              | Animals | n | 3290.97    |
| Macropus_eugenii_ott539171            | Animals | n | 1153       |
| Magnaporthe_grisea_ott258235          | Fungi   | y | 42.711     |
| Malus_domestica_ott3902985            | Plants  | n | 1874.77    |
| Malus_sieversii_ott321926             | Plants  | n | 733.5      |
| Malus_pumila_ott854961                | Plants  | n | 753.06     |
| Mangifera_foetida_ott422407           | Plants  | n | 440.1      |
| Manihot_esculenta_ott339369           | Plants  | n | 1222.5     |
| Penaeus_japonicus_ott5787510          | Animals | n | 2767.74    |
| Medicago_sativa_ott1086789            | Plants  | n | 1276.29    |
| Medicago_truncatula_ott1060499        | Plants  | n | 469.44     |
| Melampsora lini_ott809207             | Fungi   | y | 170.172    |
| Meleagris_gallopavo_ott446482         | Animals | n | 1431.14    |
| Meloidogyne_hapla_ott1043271          | Animals | y | 53.013     |
| Melospiza_melodia_ott265548           | Animals | n | 1398.54    |
| Maylandia_zebra_ott677719             | Animals | n | 848.776495 |
| Microtus_ochrogaster_ott927240        | Animals | n | 2287.34    |
| Erythranthe_guttata_ott504496         | Plants  | n | 450        |
| Miscanthus_sinensis_ott764796         | Plants  | n | 2591.7     |
| Misgurnus_anguillicaudatus_ott312382  | Animals | n | 1594.14    |
| Monodelphis_domestica_ott122362       | Animals | n | 3598.44    |
| Musa_acuminata_ott207474              | Plants  | n | 472.231    |
| Mycosphaerella_graminicola_ott5319573 | Fungi   | y | 39.7       |
| Nasonia_giraulti_ott729592            | Animals | n | 283.607    |
| Nelumbo_lutea_ott532278               | Plants  | n | 948.66     |
| Nelumbo_nucifera_ott532288            | Plants  | n | 234.72     |
| Nicotiana_langsdorffii_ott733968      | Plants  | n | 4254.3     |
| Nicotiana_tabacum_ott222787           | Plants  | n | 5066.04    |
| Nilaparvata_lugens_ott876508          | Animals | n | 1140.79    |
| Nothobranchius_furzeri_ott513643      | Animals | n | 1242.52    |
| Olea_europaea_ott23729                | Plants  | n | 1907.1     |

|                                      |         |   |            |
|--------------------------------------|---------|---|------------|
| Oncorhynchus_kisutch_ott739917       | Animals | n | 2767.74    |
| Oncorhynchus_mykiss_ott5256670       | Animals | n | 2592.678   |
| Oncorhynchus_nerka_ott165375         | Animals | n | 2858.694   |
| Oncorhynchus_tshawytscha_ott730762   | Animals | n | 2709.06    |
| Oreochromis_mossambicus_ott288069    | Animals | n | 978        |
| Oreochromis_niloticus_ott288063      | Animals | n | 1058.196   |
| Oryctolagus_cuniculus_ott864596      | Animals | n | 3107.24571 |
| Oryza_rufipogon_ott135756            | Plants  | n | 449.88     |
| Oryza_sativa_ott709894               | Plants  | n | 489        |
| Ostrea_edulis_ott1033104             | Animals | n | 1144.26    |
| Ovis_aries_ott70819                  | Animals | n | 2941.824   |
| Ovis_canadensis_ott123206            | Animals | n | 2590.55    |
| Panicum_virgatum_ott205619           | Plants  | n | 1792.674   |
| Papilio_glaucus_ott947948            | Animals | n | 430.32     |
| Papio_hamadryas_ott115463            | Animals | n | 3457.23    |
| Paralichthys_olivaceus_ott883392     | Animals | n | 694.38     |
| Parus_major_ott515143                | Animals | n | 1476.78    |
| Mizuhopecten_yessoensis_ott6370603   | Animals | n | 1437.66    |
| Penaeus_monodon_ott212713            | Animals | n | 2170       |
| Pennisetum_schweinfurthii_ott1027230 | Plants  | n | 2621.04    |
| Peromyscus_maniculatus_ott377525     | Animals | n | 4264.08    |
| Persea_americana_ott913249           | Plants  | n | 909.54     |
| Petunia_axillaris_ott232467          | Plants  | n | 1369.2     |
| Phaeosphaeria_nodorum_ott5346507     | Fungi   | y | 37.1       |
| Phalloceros_caudimaculatus_ott808637 | Animals | n | 700        |
| Phaseolus_vulgaris_ott825707         | Plants  | n | 586.8      |
| Phoenix_dactylifera_ott789008        | Plants  | n | 929.1      |
| Physcomitrella_patens_ott821359      | Plants  | n | 477.948    |
| Phytophthora_infestans_ott775725     | SAR     | y | 240        |
| Picea_abies_ott517943                | Plants  | n | 18190.8    |
| Pinus_balfouriana_ott1044480         | Plants  | n | 29281.32   |
| Pinus_elliottii_ott245809            | Plants  | n | 22787.4    |
| Pinus_koraiensis_ott830806           | Plants  | n | 27579.6    |
| Pinus_lambertiana_ott568626          | Plants  | n | 27602.7    |
| Pinus_massoniana_ott714296           | Plants  | n | 25134.6    |
| Pinus_pinaster_ott837883             | Plants  | n | 23814.3    |
| Pinus_radiata_ott568644              | Plants  | n | 21936.54   |
| Pinus_taeda_ott1075736               | Plants  | n | 21516      |
| Pinus_thunbergii_ott1075728          | Plants  | n | 4772.64    |
| Plasmodium_chabaudi_ott724404        | SAR     | y | 18.8678    |
| Plasmodium_falciparum_ott201128      | SAR     | y | 23.2703    |
| Poecilia_reticulata_ott312452        | Animals | n | 865.53     |
| Pogonomyrmex_rugosus_ott1042743      | Animals | n | 255        |
| Populus_adenopoda_ott5763644         | Plants  | n | 508.56     |
| Populus_alba_ott1030862              | Plants  | n | 508.56     |

|                                                  |         |   |          |
|--------------------------------------------------|---------|---|----------|
| <i>Populus_deltoides_ott8867</i>                 | Plants  | n | 500      |
| <i>Populus_nigra_ott8848</i>                     | Plants  | n | 514.0368 |
| <i>Populus_tremula_ott839584</i>                 | Plants  | n | 469.44   |
| <i>Portunus_trituberculatus_ott718120</i>        | Animals | n | 2259.18  |
| <i>Primulina_eburnea_ott5264953</i>              | Plants  | n | 1985.34  |
| <i>Pristionchus_pacificus_ott197875</i>          | Animals | n | 133.114  |
| <i>Prunus_armeniaca_ott217632</i>                | Plants  | n | 293.4    |
| <i>Prunus_avium_ott162547</i>                    | Plants  | n | 342.3    |
| <i>Prunus_dulcis_ott731568</i>                   | Plants  | n | 240      |
| <i>Prunus_kansuensis_ott1020749</i>              | Plants  | n | 293.4    |
| <i>Prunus_mume_ott426562</i>                     | Plants  | n | 234.03   |
| <i>Prunus_persica_ott259054</i>                  | Plants  | n | 273.84   |
| <i>Pseudocercospora_eucalypticola_ott4073293</i> | Fungi   | y | 74.1412  |
| <i>Punica_granatum_ott646814</i>                 | Plants  | n | 704.16   |
| <i>Pyrus_communis_ott972654</i>                  | Plants  | n | 537.9    |
| <i>Pyrus_ussuriensis_ott116277</i>               | Plants  | n | 909.5    |
| <i>Rana_temporaria_ott14718</i>                  | Animals | n | 4169.21  |
| <i>Raphanus_sativus_ott359073</i>                | Plants  | n | 978      |
| <i>Rattus_norvegicus_ott271555</i>               | Animals | n | 3286.08  |
| <i>Rhizopertha_dominica_ott633644</i>            | Animals | n | 476      |
| <i>Ricinus_communis_ott339346</i>                | Plants  | n | 508.56   |
| <i>Rubus_idaeus_ott156929</i>                    | Plants  | n | 311.982  |
| <i>Rubus_occidentalis_ott670811</i>              | Plants  | n | 293.4    |
| <i>Ruditapes_philippinarum_ott913666</i>         | Animals | n | 1967     |
| <i>Saccharina_japonica_ott246789</i>             | SAR     | n | 543.426  |
| <i>Salmo_salar_ott688328</i>                     | Animals | n | 3048.426 |
| <i>Salmo_trutta_ott688332</i>                    | Animals | n | 2875.32  |
| <i>Salvia_miltiorrhiza_ott847543</i>             | Plants  | n | 615      |
| <i>Schistosoma_mansoni_ott191483</i>             | Animals | y | 364.538  |
| <i>Sciaenops_ocellatus_ott433079</i>             | Animals | n | 381.42   |
| <i>Scleropages_formosus_ott335717</i>            | Animals | n | 777.359  |
| <i>Scophthalmus_maximus_ott778695</i>            | Animals | n | 841.08   |
| <i>Scylla_paramamosain_ott1084541</i>            | Animals | n | 1603.92  |
| <i>Secale_cereale_ott553015</i>                  | Plants  | n | 8097.84  |
| <i>Seriola_quinqueradiata_ott186469</i>          | Animals | n | 811.74   |
| <i>Sesamum_indicum_ott504628</i>                 | Plants  | n | 948.66   |
| <i>Setaria_italica_ott553005</i>                 | Plants  | n | 518.34   |
| <i>Silene_latifolia_ott609504</i>                | Plants  | n | 2640.6   |
| <i>Sinapis_alba_ott359058</i>                    | Plants  | n | 489      |
| <i>Solanum_lycopersicum_ott378964</i>            | Plants  | n | 823.786  |
| <i>Solanum_melongena_ott494843</i>               | Plants  | n | 958.44   |
| <i>Solanum_pennellii_ott1069768</i>              | Plants  | n | 926.426  |
| <i>Solanum_pimpinellifolium_ott797186</i>        | Plants  | n | 688.247  |
| <i>Solanum_tuberosum_ott494835</i>               | Plants  | n | 860.64   |
| <i>Sorghum_bicolor_ott552986</i>                 | Plants  | n | 1188.27  |

|                                         |         |   |           |
|-----------------------------------------|---------|---|-----------|
| <i>Sparus_aurata_ott760723</i>          | Animals | n | 929.1     |
| <i>Spinacia_oleracea_ott317784</i>      | Plants  | n | 1007.3    |
| <i>Strongyloides_ratti_ott1040287</i>   | Animals | y | 43.1502   |
| <i>Sus_scrofa_ott730013</i>             | Animals | n | 2922.264  |
| <i>Taeniopygia_guttata_ott708327</i>    | Animals | n | 1222.5    |
| <i>Takifugu_rubripes_ott65341</i>       | Animals | n | 391.2     |
| <i>Taraxacum_kok_saghyz_ott843397</i>   | Plants  | n | 1420      |
| <i>Theobroma_cacao_ott388185</i>        | Plants  | n | 420.5     |
| <i>Thunnus_orientalis_ott833202</i>     | Animals | n | 800       |
| <i>Tigriopus_californicus_ott461524</i> | Animals | n | 244.5     |
| <i>Tribolium_castaneum_ott148904</i>    | Animals | n | 202.935   |
| <i>Tribolium_echinatum_ott677520</i>    | Animals | n | 245       |
| <i>Trichogramma_brassicae_ott137951</i> | Animals | y | 246       |
| <i>Trifolium_pratense_ott839027</i>     | Plants  | n | 528.12    |
| <i>Trifolium_repens_ott116218</i>       | Plants  | n | 1095.36   |
| <i>Trifolium_subterraneum_ott539553</i> | Plants  | n | 547.68    |
| <i>Triticum_aestivum_ott31926</i>       | Plants  | n | 16948.74  |
| <i>Trypanosoma_brucei_ott494245</i>     | SAR     | y | 22.1481   |
| <i>Undaria_pinnatifida_ott616561</i>    | SAR     | n | 560       |
| <i>Vaccinium_corymbosum_ott567253</i>   | Plants  | n | 655.26    |
| <i>Vaccinium_macrocarpon_ott295602</i>  | Plants  | n | 414.622   |
| <i>Vanilla_tahitensis_ott1064791</i>    | Plants  | n | 5603.94   |
| <i>Vespula_vulgaris_ott52839</i>        | Animals | n | 219.8     |
| <i>Vicia_faba_ott539544</i>             | Plants  | n | 17622.582 |
| <i>Vigna_angularis_ott1065959</i>       | Plants  | n | 537.9     |
| <i>Vigna_mungo_ott1065954</i>           | Plants  | n | 537.9     |
| <i>Vigna_radiata_ott806245</i>          | Plants  | n | 894.87    |
| <i>Vigna_unguiculata_ott1065941</i>     | Plants  | n | 586.8     |
| <i>Vigna_vexillata_ott581960</i>        | Plants  | n | 567.24    |
| <i>Vitis_amurensis_ott805071</i>        | Plants  | n | 489       |
| <i>Vitis_cinerea_ott314458</i>          | Plants  | n | 489       |
| <i>Vitis_vinifera_ott756728</i>         | Plants  | n | 446.946   |
| <i>Xenopus_tropicalis_ott940184</i>     | Animals | n | 1440.4    |
| <i>Xiphophorus_maculatus_ott416852</i>  | Animals | n | 885.09    |
| <i>Zea_mays_ott605194</i>               | Plants  | n | 2669.9    |
| <i>Ziziphus_jujuba_ott73483</i>         | Plants  | n | 437.754   |
| <i>Zoysia_japonica_ott586007</i>        | Plants  | n | 420.54    |
| <i>Zoysia_matrella_ott205630</i>        | Plants  | n | 563.439   |
| <i>Zymoseptoria_tritici_ott906425</i>   | Fungi   | y | 39.6863   |



| HCN | MapLength.c | Sexual.sys   | Ref.# |
|-----|-------------|--------------|-------|
| 13  | 966         | NA           | 1     |
| 19  | 2033.8      | male.haploid | 2     |
| 14  | 1391        | hermaphrodi  | 3     |
| 29  | 3445        | NA           | 4     |
| 5   | 394         | parthenogen  | 5     |
| 3   | 235         | gonochorous  | 6     |
| 3   | 212.6       | gonochorous  | 7     |
| 7   | 818         | NA           | 8     |
| 7   | 1374.4      | NA           | 9     |
| 7   | 948.72      | NA           | 10    |
| 13  | 1156        | NA           | 11    |
| 14  | 1156        | NA           | 12    |
| 14  | 1424        | NA           | 13    |
| 9   | 808         | NA           | 14    |
| 16  | 1288        | NA           | 15    |
| 14  | 5251.3      | gonochorous  | 16    |
| 25  | 2113        | NA           | 17    |
| 40  | 1766        | gonochorous  | 18    |
| 19  | 1436.5      | gonochorous  | 19    |
| 3   | 145         | gonochorous  | 20    |
| 24  | 1332.8      | NA           | 21    |
| 15  | 1023.5      | NA           | 22    |
| 16  | 574.5       | male.haploid | 23    |
| 16  | 4115        | male.haploid | 24    |
| 22  | 3706.6      | gonochorous  | 25    |
| 8   | 567         | NA           | 26    |
| 5   | 422.5       | NA           | 27    |
| 10  | 1081.3      | NA           | 28    |
| 20  | 1446.7      | NA           | 29    |
| 16  | 849.3       | NA           | 30    |
| 24  | 1917.3      | gonochorous  | 31    |
| 21  | 1177        | gonochorous  | 32    |
| 14  | 1271        | NA           | 33    |
| 8   | 3624.7      | NA           | 34    |
| 20  | 1249.3      | NA           | 35    |
| 25  | 2110.7      | gonochorous  | 36    |
| 21  | 2843        | NA           | 37    |
| 5   | 646         | gonochorous  | 38    |
| 8   | 889         | NA           | 39    |
| 14  | 1099        | NA           | 40    |
| 9   | 555         | NA           | 41    |
| 14  | 2489.7      | NA           | 42    |
| 28  | 1642.2      | gonochorous  | 43    |
| 30  | 2647        | gonochorous  | 44    |

|    |         |              |    |
|----|---------|--------------|----|
| 31 | 1638    | gonochorous  | 45 |
| 14 | 2265.1  | NA           | 46 |
| 18 | 2047    | male.haploid | 47 |
| 28 | 3320    | gonochorous  | 48 |
| 31 | 3159.1  | gonochorous  | 49 |
| 10 | 536.1   | male.haploid | 50 |
| 10 | 973.3   | NA           | 51 |
| 17 | 2048    | NA           | 52 |
| 18 | 1579    | NA           | 53 |
| 19 | 1917.9  | NA           | 54 |
| 9  | 890.01  | NA           | 55 |
| 10 | 858.98  | NA           | 56 |
| 11 | 1059    | NA           | 57 |
| 20 | 1385.6  | NA           | 58 |
| 15 | 1218    | NA           | 59 |
| 39 | 2085.1  | gonochorous  | 60 |
| 30 | 2737    | gonochorous  | 61 |
| 16 | 1064.4  | NA           | 62 |
| 12 | 1372    | NA           | 63 |
| 12 | 1056    | NA           | 64 |
| 50 | 5252    | NA           | 65 |
| 18 | 1069.9  | NA           | 66 |
| 12 | 959.44  | NA           | 67 |
| 12 | 743     | NA           | 68 |
| 6  | 1790.4  | NA           | 69 |
| 39 | 2178.8  | NA           | 70 |
| 18 | 1404    | NA           | 71 |
| 11 | 1801    | NA           | 72 |
| 17 | 1000    | NA           | 73 |
| 19 | 1561.8  | NA           | 74 |
| 8  | 1083.93 | NA           | 75 |
| 14 | 4218.9  | hermaphrodi  | 76 |
| 14 | 650     | hermaphrodi  | 77 |
| 11 | 1096    | NA           | 78 |
| 9  | 1084.1  | NA           | 79 |
| 9  | 976.58  | NA           | 80 |
| 3  | 179.65  | gonochorous  | 81 |
| 16 | 2739    | NA           | 82 |
| 22 | 3800    | NA           | 83 |
| 13 | 1346    | NA           | 84 |
| 7  | 2016    | NA           | 85 |
| 7  | 358.5   | NA           | 86 |
| 40 | 3061    | NA           | 87 |
| 7  | 1175    | NA           | 88 |
| 32 | 2816    | gonochorous  | 89 |

|    |          |             |     |
|----|----------|-------------|-----|
| 10 | 588      | seq.hermaph | 90  |
| 10 | 905      | NA          | 91  |
| 17 | 1071.55  | gonochorous | 92  |
| 14 | 1500     | NA          | 93  |
| 11 | 1266.2   | NA          | 94  |
| 24 | 1176.1   | gonochorous | 95  |
| 12 | 1150     | NA          | 96  |
| 7  | 1061.19  | NA          | 97  |
| 20 | 2533.8   | NA          | 98  |
| 20 | 1936     | NA          | 99  |
| 20 | 2817.6   | NA          | 100 |
| 3  | 189.9    | gonochorous | 101 |
| 39 | 935      | gonochorous | 102 |
| 17 | 1251.15  | NA          | 103 |
| 18 | 1055     | NA          | 104 |
| 21 | 1624     | gonochorous | 105 |
| 50 | 3565.9   | gonochorous | 106 |
| 7  | 715.77   | NA          | 107 |
| 25 | 2177.363 | gonochorous | 108 |
| 10 | 1614.5   | parthenogen | 109 |
| 12 | 1206     | parthenogen | 110 |
| 9  | 635.1    | NA          | 111 |
| 15 | 978.3    | NA          | 112 |
| 24 | 1373.1   | NA          | 113 |
| 4  | 245.3    | gonochorous | 114 |
| 34 | 2459.3   | NA          | 115 |
| 14 | 2883.9   | NA          | 116 |
| 12 | 653      | NA          | 117 |
| 16 | 1499.5   | NA          | 118 |
| 16 | 1485     | NA          | 119 |
| 14 | 2574     | NA          | 120 |
| 24 | 969.5    | hermaphrodi | 121 |
| 32 | 2772     | gonochorous | 122 |
| 9  | 623.6    | NA          | 123 |
| 17 | 1036     | NA          | 124 |
| 73 | 5125.53  | gonochorous | 125 |
| 25 | 1289.3   | gonochorous | 126 |
| 11 | 1236     | NA          | 127 |
| 11 | 1107     | NA          | 128 |
| 11 | 1241.4   | NA          | 129 |
| 11 | 1208.5   | NA          | 130 |
| 17 | 2133     | NA          | 131 |
| 8  | 1574.3   | NA          | 132 |
| 19 | 4464     | gonochorous | 133 |
| 44 | 1895.795 | gonochorous | 134 |

|    |                      |     |
|----|----------------------|-----|
| 21 | 1417.5 NA            | 135 |
| 30 | 1787 gonochorous     | 136 |
| 7  | 451.7 NA             | 137 |
| 7  | 416.2 NA             | 138 |
| 28 | 1820 NA              | 139 |
| 11 | 2774.4 parthenogen   | 140 |
| 4  | 1140 parthenogen     | 141 |
| 15 | 86 parthenogen       | 142 |
| 11 | 2188 parthenogen     | 143 |
| 23 | 1421.92 gonochorous  | 144 |
| 35 | 2762.2 gonochorous   | 145 |
| 22 | 1980.74 gonochorous  | 146 |
| 13 | 613.7 NA             | 147 |
| 9  | 431 gonochorous      | 148 |
| 20 | 2445.8 NA            | 149 |
| 26 | 5115.6 NA            | 150 |
| 26 | 4071.98 NA           | 151 |
| 13 | 2325 NA              | 152 |
| 26 | 3320.8 NA            | 153 |
| 16 | 2190.1 NA            | 154 |
| 18 | 1038 NA              | 155 |
| 22 | 1225.68 NA           | 156 |
| 22 | 1130.63 NA           | 157 |
| 17 | 2472 NA              | 158 |
| 21 | 1364.23 gonochorous  | 159 |
| 9  | 539 gonochorous      | 160 |
| 18 | 4160 NA              | 161 |
| 18 | 4924.8 NA            | 162 |
| 18 | 1650 NA              | 163 |
| 24 | 1514 gonochorous     | 164 |
| 7  | 927.07 NA            | 165 |
| 10 | 745.9 NA             | 166 |
| 12 | 1770.722 gonochorous | 167 |
| 24 | 1561.1 gonochorous   | 168 |
| 19 | 2713 NA              | 169 |
| 29 | 3240 gonochorous     | 170 |
| 90 | 8184.5 NA            | 171 |
| 15 | 616 gonochorous      | 172 |
| 11 | 1655.8 NA            | 173 |
| 16 | 2457.82 NA           | 174 |
| 24 | 1248 NA              | 175 |
| 25 | 1373.8 NA            | 176 |
| 9  | 2974 NA              | 177 |
| 24 | 5451.3 NA            | 178 |
| 12 | 546.5 NA             | 179 |

|    |         |              |     |
|----|---------|--------------|-----|
| 24 | 1412.9  | hermaphrodi  | 180 |
| 7  | 2429.61 | NA           | 181 |
| 24 | 1576.75 | NA           | 182 |
| 18 | 1032    | gonochorous  | 183 |
| 15 | 1151    | NA           | 184 |
| 44 | 4271.43 | gonochorous  | 185 |
| 7  | 488.8   | NA           | 186 |
| 7  | 952.6   | NA           | 187 |
| 6  | 508.5   | NA           | 188 |
| 24 | 392     | gonochorous  | 189 |
| 23 | 605     | gonochorous  | 190 |
| 13 | 1436.12 | NA           | 191 |
| 25 | 2169    | NA           | 192 |
| 20 | 1629.9  | NA           | 193 |
| 22 | 2048    | gonochorous  | 194 |
| 7  | 1402.4  | gonochorous  | 195 |
| 7  | 1247    | NA           | 196 |
| 17 | 1267    | NA           | 197 |
| 17 | 1299.67 | NA           | 198 |
| 17 | 1481.72 | NA           | 199 |
| 20 | 3148.28 | NA           | 200 |
| 18 | 2412    | NA           | 201 |
| 43 | 3610.9  | gonochorous  | 202 |
| 32 | 2133    | NA           | 203 |
| 8  | 1215    | NA           | 204 |
| 18 | 5860    | NA           | 205 |
| 32 | 2324    | gonochorous  | 206 |
| 16 | 1294.1  | parthenogen  | 207 |
| 40 | 1731    | gonochorous  | 208 |
| 22 | 1933    | NA           | 209 |
| 28 | 1707    | gonochorous  | 210 |
| 14 | 1750    | NA           | 211 |
| 19 | 1605.5  | NA           | 212 |
| 25 | 723.35  | gonochorous  | 213 |
| 9  | 715     | gonochorous  | 214 |
| 11 | 1197    | NA           | 215 |
| 21 | 1216    | NA           | 216 |
| 5  | 620     | male.haploid | 217 |
| 8  | 494.3   | NA           | 218 |
| 8  | 581.3   | NA           | 219 |
| 9  | 1062    | NA           | 220 |
| 24 | 2662.43 | NA           | 221 |
| 15 | 1093.3  | gonochorous  | 222 |
| 19 | 1965    | NA           | 223 |
| 23 | 3049    | NA           | 224 |

|    |                     |     |
|----|---------------------|-----|
| 30 | 358.55 gonochorous  | 225 |
| 29 | 3600 gonochorous    | 226 |
| 29 | 3186.5 NA           | 227 |
| 34 | 3119.7 gonochorous  | 228 |
| 22 | 1067.6 NA           | 229 |
| 22 | 704 gonochorous     | 230 |
| 22 | 1419 gonochorous    | 231 |
| 12 | 1596.8 NA           | 232 |
| 12 | 1650 NA             | 233 |
| 10 | 536.4 NA            | 234 |
| 27 | 3304 gonochorous    | 235 |
| 27 | 3051 gonochorous    | 236 |
| 18 | 2085.2 NA           | 237 |
| 28 | 1167 gonochorous    | 238 |
| 20 | 2354 gonochorous    | 239 |
| 24 | 1695.15 gonochorous | 240 |
| 32 | 1916.82 gonochorous | 241 |
| 19 | 1918.65 NA          | 242 |
| 44 | 3488.5 gonochorous  | 243 |
| 7  | 716.7 NA            | 244 |
| 24 | 1499 gonochorous    | 245 |
| 12 | 1087.4 NA           | 246 |
| 7  | 970 NA              | 247 |
| 17 | 1932.1 NA           | 248 |
| 24 | 1477 NA             | 249 |
| 11 | 1042.2 NA           | 250 |
| 18 | 1293 NA             | 251 |
| 27 | 4410 NA             | 252 |
| 9  | 1091 NA             | 253 |
| 12 | 1889.2 NA           | 254 |
| 12 | 1572.8 NA           | 255 |
| 12 | 1036.3 NA           | 256 |
| 12 | 857.46 NA           | 257 |
| 12 | 1231 NA             | 258 |
| 12 | 1956 NA             | 259 |
| 12 | 1708 NA             | 260 |
| 12 | 1060 NA             | 261 |
| 12 | 2305 NA             | 262 |
| 7  | 1255 NA             | 263 |
| 14 | 1676 NA             | 264 |
| 14 | 2514 NA             | 265 |
| 23 | 899 gonochorous     | 266 |
| 16 | 2823 male.haploid   | 267 |
| 19 | 2178.5 NA           | 268 |
| 19 | 3027.1 NA           | 269 |

|    |          |             |     |
|----|----------|-------------|-----|
| 19 | 4067.16  | NA          | 270 |
| 19 | 2278.5   | NA          | 271 |
| 19 | 1542.35  | NA          | 272 |
| 53 | 3519.45  | gonochorous | 273 |
| 18 | 3774.7   | NA          | 274 |
| 6  | 338.6    | NA          | 275 |
| 8  | 522.69   | NA          | 276 |
| 8  | 849      | NA          | 277 |
| 8  | 591.4    | NA          | 278 |
| 8  | 616      | NA          | 279 |
| 8  | 1550.62  | NA          | 280 |
| 8  | 389.2    | NA          | 281 |
| 12 | 1416     | NA          | 282 |
| 8  | 1141     | NA          | 283 |
| 17 | 2243.4   | NA          | 284 |
| 12 | 742      | NA          | 285 |
| 13 | 1698.8   | gonochorous | 286 |
| 9  | 1538     | NA          | 287 |
| 22 | 1503     | gonochorous | 288 |
| 9  | 390.1    | NA          | 289 |
| 10 | 1551     | NA          | 290 |
| 7  | 462.7    | NA          | 291 |
| 7  | 309      | NA          | 292 |
| 19 | 1926.98  | NA          | 293 |
| 31 | 1782.75  | NA          | 294 |
| 29 | 5961     | gonochorous | 295 |
| 40 | 1403     | gonochorous | 296 |
| 8  | 1516     | NA          | 297 |
| 8  | 1134.84  | gonochorous | 298 |
| 24 | 1815.3   | NA          | 299 |
| 22 | 2218.3   | gonochorous | 300 |
| 22 | 2622.09  | NA          | 301 |
| 44 | 2746.4   | gonochorous | 302 |
| 7  | 1593     | NA          | 303 |
| 24 | 1128.595 | NA          | 304 |
| 16 | 2981.28  | NA          | 305 |
| 9  | 1318.8   | NA          | 306 |
| 12 | 671.1    | NA          | 307 |
| 12 | 890.4    | NA          | 308 |
| 12 | 1297.3   | NA          | 309 |
| 12 | 1285.5   | NA          | 310 |
| 12 | 789.7    | NA          | 311 |
| 12 | 1567.5   | NA          | 312 |
| 12 | 883      | NA          | 313 |
| 10 | 2158     | NA          | 314 |

|    |         |              |     |
|----|---------|--------------|-----|
| 24 | 3899    | hermaphrodi  | 315 |
| 6  | 433.6   | NA           | 316 |
| 3  | 90.2    | parthenogen  | 317 |
| 20 | 2012    | gonochorous  | 318 |
| 35 | 1479    | gonochorous  | 319 |
| 22 | 1696.3  | gonochorous  | 320 |
| 8  | 894.1   | NA           | 321 |
| 10 | 852.8   | NA           | 322 |
| 24 | 1162.6  | gonochorous  | 323 |
| 12 | 401     | gonochorous  | 324 |
| 10 | 571     | gonochorous  | 325 |
| 8  | 968     | gonochorous  | 326 |
| 5  | 1330    | male.haploid | 327 |
| 7  | 2084    | NA           | 328 |
| 16 | 1274    | NA           | 329 |
| 8  | 1701.7  | NA           | 330 |
| 21 | 2875.3  | NA           | 331 |
| 11 | 1157.5  | NA           | 332 |
| 30 | 1816.28 | NA           | 333 |
| 12 | 1621    | NA           | 334 |
| 12 | 1112    | NA           | 335 |
| 13 | 1035.85 | NA           | 336 |
| 25 | 2129    | male.haploid | 337 |
| 6  | 1216.8  | NA           | 338 |
| 11 | 1628.15 | NA           | 339 |
| 11 | 865.1   | NA           | 340 |
| 11 | 732.9   | NA           | 341 |
| 11 | 852.4   | NA           | 342 |
| 11 | 973.9   | NA           | 343 |
| 19 | 1123    | NA           | 344 |
| 19 | 1155.98 | NA           | 345 |
| 19 | 1929.13 | NA           | 346 |
| 10 | 1668    | gonochorous  | 347 |
| 24 | 1328.3  | gonochorous  | 348 |
| 10 | 1545.65 | NA           | 349 |
| 12 | 1456.53 | NA           | 350 |
| 20 | 1337.2  | NA           | 351 |
| 20 | 1824.95 | NA           | 352 |
| 21 | 4255.4  | NA           | 353 |
