# Supplementary material for: Variation in recombination frequency and distribution across eukaryotes: patterns and processes
Source: PubMed Central journal article supplement (PMC5698618; doi:10.1098/rstb.2016.0455), 2017-11-06
Supplement: rstb20160455supp3.pdf [file rstb20160455supp3.pdf]

| Ref.# | First Author   | Year | Reference                                                                                                                                                                                                                                                                                                                                                                                                                                                                                                                                                                                            |
|-------|----------------|------|------------------------------------------------------------------------------------------------------------------------------------------------------------------------------------------------------------------------------------------------------------------------------------------------------------------------------------------------------------------------------------------------------------------------------------------------------------------------------------------------------------------------------------------------------------------------------------------------------|
| 1     | Butcher        | 2000 | Butcher, P. A., and G. F. Moran. 2000. Genetic linkage mapping in <i>Acacia mangium</i> . 2. Development of an integrated map from two outbred pedigrees using RFLP and microsatellite loci. <i>Theoretical and Applied Genetics</i> <b>101</b> :594-599.                                                                                                                                                                                                                                                                                                                                            |
| 2     | Sirvio         | 2011 | Sirvio, A., J. Gadau, O. Rueppell, D. Lamatsch, J. J. Boomsma, P. Pamilo, and R. E. Page. 2006. High recombination frequency creates genotypic diversity in colonies of the leaf-cutting ant <i>Acromyrmex echinator</i> . <i>Journal of Animal Ecology</i> <b>75</b> :100-107.                                                                                                                                                                                                                                                                                                                      |
| 3     | Wang           | 2009 | Wang, S., L. L. Zhang, E. Meyer, and M. V. Matz. 2009. Construction of a high-resolution genetic linkage map and comparative genome analysis for the reef-building coral <i>Acropora millepora</i> . <i>Genome Biology</i> <b>10</b> :R111.                                                                                                                                                                                                                                                                                                                                                          |
| 4     | Scaglione      | 2015 | Scaglione, D., A. Fornasiero, C. Pinto, F. Cattonaro, A. Spadotto, R. Infante, C. Meneses, R. Messina, O. Lain, G. Cipriani, and R. Testolin. 2015. A RAD-based linkage map of kiwifruit ( <i>Actinidia chinensis</i> Pl.) as a tool to improve the genome assembly and to scan the genomic region of the gender determinant for the marker-assisted breeding. <i>Tree Genetics &amp; Genomes</i> <b>11</b> :1-12.                                                                                                                                                                                   |
| 5     | Hawthorne      | 2001 | Hawthorne, D. J., and S. Via. 2001. Genetic linkage of ecological specialization and reproductive isolation in pea aphids. <i>Nature</i> <b>412</b> :904-907.                                                                                                                                                                                                                                                                                                                                                                                                                                        |
| 6     | Juneja         | 2014 | Juneja, P., J. Osei-Poku, Y. S. Ho, C. V. Ariani, W. J. Palmer, A. Pain, and F. M. Jiggins. 2014. Assembly of the Genome of the Disease Vector <i>Aedes aegypti</i> onto a Genetic Linkage Map Allows Mapping of Genes Affecting Mosquito-Plant Interactions. <i>PLoS ONE</i> <b>9</b> :e100098.                                                                                                                                                                                                                                                                                                     |
| 7     | Sutherland     | 2011 | Sutherland, I. W., A. Mori, J. Montgomery, K. L. Fleming, J. M. Anderson, J. G. Valenzuela, D. W. Severson, and W. C. Black. 2011. A Linkage Map of the Asian Tiger Mosquito ( <i>Aedes albopictus</i> ) Based on cDNA Markers. <i>Journal of Molecular Evolution</i> <b>73</b> :100-110.                                                                                                                                                                                                                                                                                                            |
| 8     | Olivera        | 2013 | Olivera, P. D., A. Kilian, P. Wenzl, and B. J. Steffenson. 2013. Development of a genetic linkage map for Sharon goatgrass ( <i>Aegilops sharonensis</i> ) and mapping of a leaf rust resistance gene. <i>Genome</i> <b>56</b> :367-376.                                                                                                                                                                                                                                                                                                                                                             |
| 9     | Luo            | 2013 | Luo, M. C., Y. Q. Gu, F. M. You, K. R. Deal, Y. Q. Ma, Y. Q. Hu, N. X. Huo, Y. Wang, J. R. Wang, S. Y. Chen, C. M. Jorgensen, Y. Zhang, P. E. McGuire, S. Pasternak, J. C. Stein, D. Ware, M. Kramer, W. R. McCombie, S. F. Kianian, M. M. Martis, K. F. X. Mayer, S. K. Sehgal, W. L. Li, B. S. Gill, M. W. Bevan, H. Simkova, J. Dolezel, W. N. Song, G. R. Lazo, O. D. Anderson, and J. Dvorak. 2013. A 4-gigabase physical map unlocks the structure and evolution of the complex genome of <i>Aegilops tauschii</i> , the wheat D-genome progenitor. <i>Genome Research</i> <b>23</b> :100-110. |
| 10    | Edae           | 2017 | Edae, E. A., P. D. Olivera, Y. Jin, and M. N. Rouse. 2017. Genotyping-by-Sequencing Facilitates a High-Density Consensus Linkage Map for <i>Aegilops umbellulata</i> , a Wild Relative of Cultivated Wheat. <i>Genetics</i> <b>201</b> :1-12.                                                                                                                                                                                                                                                                                                                                                        |
| 11    | Foulogne-Oriol | 2010 | Foulogne-Oriol, M., C. Spataro, V. Cathalot, S. Monllor, and J. M. Savoie. 2010. An expanded genetic linkage map of an intervarietal <i>Agaricus bisporus</i> var. <i>bisporus</i> x <i>A. bisporus</i> var. <i>burnettii</i> hybrid based on AFLP, SSR and CAPS markers sheds light on the recombination behaviour of the species. <i>Genetic Resources and Crop Evolution</i> <b>57</b> :100-110.                                                                                                                                                                                                  |
| 12    | Rotter         | 2009 | Rotter, D., K. Amundsen, S. A. Bonos, W. A. Meyer, S. E. Warnke, and F. C. Belanger. 2009. Molecular Genetic Linkage Map for Allotetraploid Colonial Bentgrass. <i>Crop Science</i> <b>49</b> :1609-1619.                                                                                                                                                                                                                                                                                                                                                                                            |
| 13    | Honig          | 2014 | Honig, J. A., C. Kubik, M. Majewski, C. Poulsen, E. Weibel, K. Amundsen, S. E. Warnke, W. A. Meyer, and S. A. Bonos. 2014. A PCR-based linkage map of <i>Agrostis stolonifera</i> and identification of QTL markers for dollar spot disease. <i>Plant Breeding</i> <b>133</b> :100-110.                                                                                                                                                                                                                                                                                                              |
| 14    | Baldwin        | 2012 | Baldwin, S., R. Revanna, S. Thomson, M. Pither-Joyce, K. Wright, R. Crowhurst, M. Fiers, L. S. Chen, R. Macknight, and J. A. McCallum. 2012. A Toolkit for bulk PCR-based marker design from next-generation sequence data: application for development of a framework linkage map in bulb onion ( <i>Allium cepa</i> L.). <i>Genetic Resources and Crop Evolution</i> <b>59</b> :100-110.                                                                                                                                                                                                           |
| 15    | Maughan        | 2011 | Maughan, P. J., S. M. Smith, D. J. Fairbanks, and E. N. Jellen. 2011. Development, Characterization, and Linkage Mapping of Single Nucleotide Polymorphisms in the Grain Amaranths ( <i>Amaranthus</i> sp.). <i>Plant Genome</i> <b>4</b> :92-102.                                                                                                                                                                                                                                                                                                                                                   |
| 16    | Smith          | 2005 | Smith, J. J., D. K. Kump, J. A. Walker, D. M. Parichy, and S. R. Voss. 2005. A comprehensive expressed sequence tag linkage map for tiger salamander ( <i>Ambystoma tigrinum</i> ) and Mexican axolotl: enabling gene mapping and comparative genomics in <i>Ambystoma</i> . <i>Genetics</i> <b>170</b> :100-110.                                                                                                                                                                                                                                                                                    |
| 17    | deSousa        | 2013 | de Sousa, N., J. Carlier, T. Santo, and J. Leitao. 2013. An integrated genetic linkage map of pineapple ( <i>Ananas comosus</i> (L.) Merr.). <i>Scientia Horticulturae</i> <b>150</b> :100-110.                                                                                                                                                                                                                                                                                                                                                                                                      |
| 18    | Huang          | 2009 | Huang, C. W., Y. S. Cheng, R. Rouvier, K. T. Yang, C. P. Wu, H. L. Huang, and M. C. Huang. 2009. Duck ( <i>Anas platyrhynchos</i> ) linkage mapping by AFLP fingerprinting. <i>Genetics Selection Evolution</i> <b>41</b> :100-110.                                                                                                                                                                                                                                                                                                                                                                  |

- Kai, W., K. Nomura, A. Fujiwara, Y. Nakamura, M. Yasuike, N. Ojima, T. Masaoka, A. Ozaki, Y. Kazeto, K. Gen, J. Nagao, H. Tanaka, T. Kobayashi, and M. Ototake. 2014. A ddRAD-based genetic map and its integration with the genome assembly of Japanese eel (*Anguilla japonica*) provides insights into genome evolution after the teleost-specific genome duplication. *Bmc Wondji*, C. S., J. Morgan, M. Coetzee, R. H. Hunt, K. Steen, W. C. Black, J. Hemingway, and H. Ranson. 2007. Mapping a quantitative trait locus (QTL) conferring pyrethroid resistance in the African malaria vector *Anopheles Rondeau*, E. B., A. M. Messmer, D. S. Sanderson, S. G. Jantzen, K. R. von Schalburg, D. R. Minkley, J. S. Leong, G. M. Macdonald, A. E. Davidsen, W. A. Parker, R. S. A. Mazzola, B. Campbell, and B. F. Koop. 2013. Genomics of sablefish (*Anoplopoma fimbria*): expressed genes, mitochondrial phylogeny, linkage map and identification of a putative sex gene. *Bmc Genomics* **14**. Venkat, S. K., P. Bommisetty, M. S. Patil, L. Reddy, and A. Chennareddy. 2014. The genetic linkage maps of *Anthurium* species based on RAPID, ISSR and SRAP markers. *Scientia Horticulturae* **178**:132-137. Shi, Y. Y., L. X. Sun, Z. Y. Huang, X. B. Wu, Y. Q. Zhu, H. J. Zheng, and Z. J. Zeng. 2013. A SNP Based High-Density Linkage Map of *Apis cerana* Reveals a High Recombination Rate Similar to *Apis mellifera*. *Plos One* **8**. Solignac, M., F. Mougél, D. Vautrin, M. Monnerot, and J. M. Cornuet. 2007. A third-generation microsatellite-based linkage map of the honey bee, *Apis mellifera*, and its comparison with the sequence-based physical map. Tian, M. L., Y. P. Li, J. Jing, C. Mu, H. X. Du, J. Z. Dou, J. X. Mao, X. Li, W. Q. Jiao, Y. F. Wang, X. L. Hu, S. Wang, R. J. Wang, and Z. M. Bao. 2015. Construction of a High-Density Genetic Map and Quantitative Trait Locus Mapping in the Sea Cucumber *Apostichopus japonicus*. *Scientific Reports* **5**. Willems, G., D. B. Drager, M. Courbot, C. Gode, N. Verbruggen, and P. Saumitou-Laprade. 2007. The genetic basis of zinc tolerance in the metallophyte *Arabidopsis halleri* ssp *halleri* (Brassicaceae): An analysis of Singer, T., Y. P. Fan, H. S. Chang, T. Zhu, S. P. Hazen, and S. P. Briggs. 2006. A high-resolution map of *Arabidopsis* recombinant inbred lines by whole-genome exon array hybridization. *Plos Genetics* **2**:1352-1361. Nagy, E. D., Y. Chu, Y. F. Guo, S. Khanal, S. X. Tang, Y. Li, W. B. B. Dong, P. Timper, C. Taylor, P. Ozias-Akins, C. C. Holbrook, V. Beilinson, N. C. Nielsen, H. T. Stalker, and S. J. Knapp. 2010. Recombination is suppressed in an alien introgression in peanut harboring *Rma*, a dominant root-knot Zhou, X. J., Y. L. Xia, X. P. Ren, Y. L. Chen, L. Huang, S. M. Huang, B. S. Liao, Y. Lei, L. Y. Yan, and H. F. Jiang. 2014. Construction of a SNP-based genetic linkage map in cultivated peanut based on large scale marker development using next-generation double-digest restriction-site-associated Li, H. J., X. Liu, and G. F. Zhang. 2012. Consensus Microsatellite-Based Linkage Map for the Hermaphroditic Bay Scallop (*Argopecten irradians*) and Its Application in Size-Related QTL Analysis. *Plos One* **7**. Zhu, C., J. Tong, X. Yu, W. Guo, X. Wang, H. Liu, X. Feng, Y. Sun, L. Liu, and B. Fu. 2014. A second-generation genetic linkage map for bighead carp (*Aristichthys nobilis*) based on microsatellite markers. *Animal Genetics* **45**:699-De Vos, S., P. Bossier, G. Van Stappen, I. Vercauteren, P. Sorgeloos, and M. Vuylsteke. 2013. A first AFLP-Based Genetic Linkage Map for Brine Shrimp *Artemia franciscana* and Its Application in Mapping the Sex Locus. *Plos One* Phan, H. T. T., R. Ford, and P. W. J. Taylor. 2003. Mapping the mating type locus of *Ascochyta rabiei*, the causal agent of ascochyta blight of chickpea. Christians, J. K., M. S. Cheema, I. A. Vergara, C. A. Watt, L. J. Pinto, N. S. Chen, and M. M. Moore. 2011. Quantitative Trait Locus (QTL) Mapping Reveals a Role for Unstudied Genes in *Aspergillus* Virulence. *Plos One* **6**. Sanetra, M., F. Henning, S. Fukamachi, and A. Meyer. 2009. A Microsatellite-Based Genetic Linkage Map of the Cichlid Fish, *Astatotilapia burtoni* (Teleostei): A Comparison of Genomic Architectures Among Rapidly Carlson, B. M., S. W. Onusko, and J. B. Gross. 2015. A High-Density Linkage Map for *Astyanax mexicanus* Using Genotyping-by-Sequencing Technology. *G3-Genes Genomes Genetics* **5**:241-251.

- Chaffin, A. S., Y.-F. Huang, S. Smith, W. A. Bekele, E. Babiker, B. N. Gnanesh, B. J. Foresman, S. G. Blanchard, J. J. Jay, R. W. Reid, C. P. Wight, S. Chao, R. Oliver, E. Islamovic, F. L. Kolb, C. McCartney, J. W. M. Fetch, A. D. Beattie, A. Bjornstad, J. M. Bonman, T. Langdon, C. J. Howarth, C. R. Brouwer, E. N. Jellen, K. E. Klos, J. A. Poland, T.-F. Hsieh, R. Brown, E. Jackson, J. A. Schlueter, and N. A. Tinker. 2016. A Consensus Map in Cultivated Hexaploid Oat Reveals Conserved Grass Synteny with Substantial
- 37 Chaffin 2016
- Sim, S. B., and S. M. Geib. 2017. A Chromosome-Scale Assembly of the *Bactrocera cucurbitae* Genome Provides Insight to the Genetic Basis of
- 38 Sim 2017
- Kuzina, V., J. K. Nielsen, J. M. Augustin, A. M. Torp, S. Bak, and S. B. Andersen. 2011. *Barbarea vulgaris* linkage map and quantitative trait loci for saponins, glucosinolates, hairiness and resistance to the herbivore *Phyllotreta*
- 39 Kuzina 2011
- Brennan, A. C., S. Bridgett, M. S. Ali, N. Harrison, A. Matthews, J. Pellicer, A. D. Twyford, and C. A. Kidner. 2012. Genomic Resources for Evolutionary Studies in the Large, Diverse, Tropical Genus, *Begonia*. *Tropical Plant*
- 40 Brennan 2012
- Laurent, V., P. Devaux, T. Thiel, F. Viard, S. Mielordt, P. Touzet, and M. C. Quillet. 2007. Comparative effectiveness of sugar beet microsatellite markers isolated from genomic libraries and GenBank ESTs to map the sugar beet
- 41 Laurent 2007
- Jiang, T. B., B. R. Zhou, F. L. Gao, and B. Z. Guo. 2011. Genetic linkage maps of white birches (*Betula platyphylla* Suk. and *B. pendula* Roth) based on
- 42 Jiang 2011
- RAPD and AFLP markers. *Molecular Breeding* **27**:347-356.
- Beldade, P., S. V. Saenko, N. Pul, and A. D. Long. 2009. A Gene-Based Linkage Map for *Bicyclus anynana* Butterflies Allows for a Comprehensive
- 43 Beldade 2009
- Analysis of Synteny with the Lepidopteran Reference Genome. *Plos Genetics*
- Schnabel, R. D., J. F. Taylor, and J. N. Derr. 2003. Development of a linkage map and QTL scan for growth traits in North American bison. *Cytogenetic and*
- 44 Schnabel 2003
- Van't Hof, A. E., P. Nguyen, M. Dalikova, N. Edmonds, F. Marec, and I. J. Saccheri. 2013. Linkage map of the peppered moth, *Biston betularia*
- 45 VantHof 2013
- (Lepidoptera, Geometridae): a model of industrial melanism. *Heredity* **110**:283-
- Liu, T. M., S. W. Tang, S. Y. Zhu, and Q. M. Tang. 2014. QTL mapping for fiber yield-related traits by constructing the first genetic linkage map in ramie
- 46 Liu 2014
- (*Boehmeria nivea* L. Gaud). *Molecular Breeding* **34**:883-892.
- Stolle, E., L. Wilfert, R. Schmid-Hempel, P. Schmid-Hempel, M. Kube, R. Reinhardt, and R. F. A. Moritz. 2011. A second generation genetic map of the
- 47 Stolle 2011
- bumblebee *Bombus terrestris* (Linnaeus, 1758) reveals slow genome and chromosome evolution in the Apidae. *Bmc Genomics* **12**.
- Zhan, S. A., J. H. Huang, Q. H. Guo, Y. P. Zhao, W. H. Li, X. X. Miao, M. R. Goldsmith, M. W. Li, and Y. P. Huang. 2009. An integrated genetic linkage
- 48 Zhan 2009
- map for silkworms with three parental combinations and its application to the Ihara, N., A. Takasuga, K. Mizoshita, H. Takeda, M. Sugimoto, Y. Mizoguchi, T. Hirano, T. Itoh, T. Watanabe, K. M. Reed, W. M. Snelling, S. M. Kappes, C. W. Beattie, G. L. Bennett, and Y. Sugimoto. 2004. A comprehensive genetic
- 49 Ihara 2004
- map of the cattle genome based on 3802 microsatellites. *Genome Research*
- Holloway, A. K., M. R. Strand, W. C. Black, and M. F. Antolin. 2000. Linkage analysis of sex determination in *Bracon* sp near *hebetor* (Hymenoptera :
- 50 Holloway 2001
- Cheng, Y., J. F. Geng, J. Y. Zhang, Q. Wang, Q. Y. Ban, and X. L. Hou. 2009. The construction of a genetic linkage map of non-heading Chinese cabbage
- 51 Cheng 2009
- (*Brassica campestris* ssp *chinensis* Makino). *Journal of Genetics and*
- Zou, J., H. Raman, S. M. Guo, D. D. Hu, Z. L. Wei, Z. L. Luo, Y. Long, W. X. Shi, Z. Fu, D. Z. Du, and J. L. Meng. 2014. Constructing a dense genetic
- 52 Zou 2014
- linkage map and mapping QTL for the traits of flower development in *Brassica carinata*. *Theoretical and Applied Genetics* **127**:1593-1605.
- Zou, J., D. D. Hu, P. F. Liu, H. Raman, Z. S. Liu, X. J. Liu, I. A. P. Parkin, B. Chalhoub, and J. L. Meng. 2016. Co-linearity and divergence of the A
- 53 Zou 2016
- subgenome of *Brassica juncea* compared with other *Brassica* species
- Zhang, Y., C. L. Thomas, J. X. Xiang, Y. Long, X. H. Wang, J. Zou, Z. L. Luo, G. D. Ding, H. M. Cai, N. S. Graham, J. P. Hammond, G. J. King, P. J. White, F. S. Xu, M. R. Broadley, L. Shi, and J. L. Meng. 2016. QTL meta-analysis of
- 54 Zhang 2016
- root traits in *Brassica napus* under contrasting phosphorus supply in two

- Zhao, Z. D., H. H. Gu, X. G. Sheng, H. F. Yu, J. S. Wang, L. Huang, and D. Wang. 2016. Genome-Wide Single-Nucleotide Polymorphisms Discovery and High-Density Genetic Map Construction in Cauliflower Using Specific-Locus Amplified Fragment Sequencing. *Frontiers in Plant Science* **7**.
- 55 Zhao 2016 Yu, S. C., T. B. Su, S. H. Zhi, F. L. Zhang, W. H. Wang, D. S. Zhang, X. Y. Zhao, and Y. J. Yu. 2016. Construction of a sequence-based bin map and mapping of QTLs for downy mildew resistance at four developmental stages in Chinese cabbage (*Brassica rapa* L. ssp *pekinensis*). *Molecular Breeding*
- 56 Yu 2016 Bohra, A., R. K. Saxena, B. N. Gnanesh, K. Saxena, M. Byregowda, A. Rathore, P. B. KaviKishor, D. R. Cook, and R. K. Varshney. 2012. An intra-specific consensus genetic map of pigeonpea *Cajanus cajan* (L.) Millspaugh
- 57 Bohra 2012 derived from six mapping populations. *Theoretical and Applied Genetics*
- 58 Gehringer 2006 Gehringer, A., W. Friedt, W. Luhs, and R. J. Snowdon. 2006. Genetic mapping of agronomic traits in false flax (*Camelina sativa* subsp *sativa*). Taniguchi, F., K. Furukawa, S. Ota-Metoku, N. Yamaguchi, T. Ujihara, I. Kono, H. Fukuoka, and J. Tanaka. 2012. Construction of a high-density
- 59 Taniguchi 2012 reference linkage map of tea (*Camellia sinensis*). *Breeding Science* **62**:263-266
- 60 Wong 2010 Wong, A. K., A. L. Ruhe, B. L. Dumont, K. R. Robertson, G. Guerrero, S. M. Shull, J. S. Ziegler, L. V. Millon, K. W. Broman, B. A. Payseur, and M. W. Neff. 2010. A Comprehensive Linkage Map of the Dog Genome. *Genetics* **184**:595-600
- 61 Schibler 1998 Schibler, L., D. Vaiman, A. Oustry, C. Giraud-Delville, and E. P. Cribiu. 1998. Comparative gene mapping: A fine-scale survey of chromosome rearrangements between ruminants and humans. *Genome Research* **8**:901-910
- 62 Linde 2001 Linde, M., S. Diel, and B. Neuffer. 2001. Flowering ecotypes of *Capsella bursa-pastoris* (L.) Medik. (*Brassicaceae*) analysed by a cosegregation of phenotypic characters (QTL) and molecular markers. *Annals of Botany* **87**:91-100
- 63 Han 2016 Han, K., H. J. Jeong, H. B. Yang, S. M. Kang, J. K. Kwon, S. Kim, D. Choi, and B. C. Kang. 2016. An ultra-high-density bin map facilitates high-throughput QTL mapping of horticultural traits in pepper (*Capsicum annuum*). Lee, Y. R., J. B. Yoon, and J. Lee. 2016. A SNP-based genetic linkage map of
- 64 Lee 2016 *Capsicum baccatum* and its comparison to the *Capsicum annuum* reference physical map. *Molecular Breeding* **36**.
- 65 Kuang 2016 Kuang, Y. Y., X. H. Zheng, C. Y. Li, X. M. Li, D. C. Cao, G. X. Tong, W. H. Lv, W. Xu, Y. Zhou, X. F. Zhang, Z. P. Sun, S. Mahboob, K. A. Al-Ghanim, J. T. Li, and X. W. Sun. 2016. The genetic map of goldfish (*Carassius auratus*) provided insights to the divergent genome evolutions in the Cyprinidae family. Chen, C. X., Q. Y. Yu, S. B. Hou, Y. J. Li, M. Eustice, R. L. Skelton, O. Veatch, R. E. Herdes, L. Diebold, J. Saw, Y. Feng, W. B. Qian, L. Bynum, L. Wang, P. H. Moore, R. E. Paull, M. Alam, and R. Ming. 2007. Construction of
- 66 Chen 2007 a sequence-tagged high-density genetic map of papaya for comparative mapping. Bowers, J. E., S. A. Pearl, and J. M. Burke. 2016. Genetic Mapping of Millions of SNPs in Safflower (*Carthamus tinctorius* L.) via Whole-Genome
- 67 Bowers 2016 Resequencing. *G3-Genes Genomes Genetics* **6**:2203-2211.
- 68 Kubisiak 2013 Kubisiak, T. L., C. D. Nelson, M. E. Staton, T. Zhebentyayeva, C. Smith, B. A. Olukolu, G. C. Fang, F. V. Hebard, S. Anagnostakis, N. Wheeler, P. H. Sisco, A. G. Abbott, and R. R. Sederoff. 2013. A transcriptome-based genetic map of Chinese chestnut (*Castanea mollissima*) and identification of regions of segmental homology with peach (*Prunus persica*). *Tree Genetics & Genomes*
- 69 Sharma 2012 Sharma, V., S. Chaudhary, S. Srivastava, R. Pandey, and S. Kumar. 2012. Characterization of variation and quantitative trait loci related to terpenoid indole alkaloid yield in a recombinant inbred line mapping population of
- 70 Nakazato 2006 Nakazato, T., M. K. Jung, E. A. Housworth, L. H. Rieseberg, and G. J. Gastony. 2006. Genetic map-based analysis of genome structure in the homosporous fern *Ceratopteris richardii*. *Genetics* **173**:1585-1597.
- 71 Maughan 2012 Maughan, P. J., S. M. Smith, J. A. Rojas-Beltran, D. Elzinga, J. A. Raney, E. N. Jellen, A. Bonifacio, J. A. Udall, and D. J. Fairbanks. 2012. Single Nucleotide Polymorphism Identification, Characterization, and Linkage Mapping of Wintersweet (*Chimonanthus praecox* (L.) Link based on AFLP and
- 72 Chen 2010 Chen, D. W., and L. Q. Chen. 2010. The first intraspecific genetic linkage maps of wintersweet *Chimonanthus praecox* (L.) Link based on AFLP and ISSR markers. *Scientia Horticulturae* **124**:88-94.

- Kathir, P., M. LaVoie, W. J. Brazelton, N. A. Haas, P. A. Lefebvre, and C. D. Silflow. 2003. Molecular map of the *Chlamydomonas reinhardtii* nuclear genome. *Genetics* **164**:113-122.
- Zhan, A., J. Hu, X. Hu, M. Hui, M. Wang, W. Peng, X. Huang, S. Wang, W. Lu, C. Sun, and Z. Bao. 2009. Construction of microsatellite-based linkage maps and identification of size-related quantitative trait loci for Zhikong Gaur. *Genetics* **181**:113-122.
- Gaur, R., G. Jeena, N. Shah, S. Gupta, S. Pradhan, A. K. Tyagi, M. Jain, D. Chattopadhyay, and S. Bhatia. 2015. High density linkage mapping of genomic and transcriptomic SNPs for synteny analysis and anchoring the Kano. *Genetics* **195**:113-122.
- Kano, S., N. Satoh, and P. Sordino. 2006. Primary Genetic Linkage Maps of the Ascidian, *Ciona intestinalis*. *Zoological Science* **23**:31-39.
- Hill, M. M., K. W. Broman, E. Stupka, W. C. Smith, D. Jiang, and A. Sidow. 2008. The *C. savignyi* genetic map and its integration with the reference sequence facilitates insights into chordate genome evolution. *Genome Research* **18**:113-122.
- Reddy, U. K., P. Nimmakayala, A. Levi, V. L. Abhuri, T. Saminathan, Y. R. Tomason, G. Vajja, R. Reddy, L. Abhuri, T. C. Wehner, Y. Ronin, and A. Karol. 2014. High-Resolution Genetic Map for Understanding the Effect of Genome-Wide Recombination Rate on Nucleotide Diversity in Watermelon. *Genetics* **196**:113-122.
- Ollitrault, P., J. Terol, C. X. Chen, C. T. Federici, S. Lotfy, I. Hippolyte, F. Ollitrault, A. Berard, A. Chauveau, J. Cuenca, G. Costantino, Y. Kacar, L. Mu, A. Garcia-Lor, Y. Froelicher, P. Aleza, A. Boland, C. Billot, L. Navarro, F. Luro, M. L. Roose, F. G. Gmitter, M. Talon, and D. Brunel. 2012. A reference genetic map of *C. clementina* hort. ex Tan.; citrus evolution inferences from Guo, F., H. W. Yu, Z. Tang, X. L. Jiang, L. Wang, X. Wang, Q. Xu, and X. X. Deng. 2015. Construction of a SNP-based high-density genetic map for pummelo using RAD sequencing. *Tree Genetics & Genomes* **11**:113-122.
- Guo, F., H. W. Yu, Z. Tang, X. L. Jiang, L. Wang, X. Wang, Q. Xu, and X. X. Deng. 2015. Construction of a SNP-based high-density genetic map for pummelo using RAD sequencing. *Tree Genetics & Genomes* **11**:113-122.
- Kaiser, T. S., and D. G. Heckel. 2012. Genetic Architecture of Local Adaptation in Lunar and Diurnal Emergence Times of the Marine Midge *Clunio marinus* (Chironomidae, Diptera). *Plos One* **7**:113-122.
- Riedel, M., M. Riederer, D. Becker, A. Herran, A. Kullaya, G. Arana-Lopez, L. Pena-Rodriguez, N. Billotte, V. Sniady, W. Rohde, and E. Ritter. 2009. Cuticular wax composition in *Cocos nucifera* L.: physicochemical analysis of wax components and mapping of their QTLs onto the coconut molecular map. *Genetics* **181**:113-122.
- Moncada, M. D., E. Tovar, J. C. Montoya, A. Gonzalez, J. Spindel, and S. McCouch. 2016. A genetic linkage map of coffee (*Coffea arabica* L.) and QTL for yield, plant height, and bean size. *Tree Genetics & Genomes* **12**:113-122.
- Muraguchi, H., Y. Ito, T. Kamada, and S. O. Yanagi. 2003. A linkage map of the basidiomycete *Coprinus cinereus* based on random amplified polymorphic DNAs and restriction fragment length polymorphisms. *Fungal Genetics and Evolution* **52**:113-122.
- Biswas, C., P. Dey, P. G. Karmakar, and S. Satpathy. 2015. Discovery of large-scale SNP markers and construction of linkage map in a RIL population of jute (*Corchorus capsularis*). *Molecular Breeding* **35**:113-122.
- Kundu, A., A. Chakraborty, N. A. Mandal, D. Das, P. G. Karmakar, N. K. Singh, and D. Sarkar. 2015. A restriction-site-associated DNA (RAD) linkage map, comparative genomics and identification of QTL for histological fibre content coincident with those for retted bast fibre yield and its major components in jute (*Corchorus olitorius* L., Malvaceae s. l.). *Molecular Breeding* **35**:113-122.
- Gagnaire, P. A., E. Normandeau, S. A. Pavey, and L. Bernatchez. 2013. Mapping phenotypic, expression and transmission ratio distortion QTL using RAD markers in the Lake Whitefish (*Coregonus clupeaformis*). *Molecular Breeding* **33**:113-122.
- Wang, X. W., P. A. Wadl, T. A. Rinehart, B. E. Scheffler, M. T. Windham, J. M. Spiers, D. H. Johnson, and R. N. Trigiano. 2009. A linkage map for flowering dogwood (*Cornus florida* L.) based on microsatellite markers. *Genetics* **181**:113-122.
- Kikuchi, S., D. Fujima, S. Sasazaki, S. Tsuji, M. Mizutani, A. Fujiwara, and H. Mannen. 2005. Construction of a genetic linkage map of Japanese quail (*Coturnix japonica*) based on AFLP and microsatellite markers. *Animal Breeding* **86**:113-122.
- Hedgecock, D., G. Shin, A. Y. Gracey, D. Van Den Berg, and M. P. Samanta. 2015. Second-Generation Linkage Maps for the Pacific Oyster *Crassostrea gigas* Reveal Errors in Assembly of Genome Scaffolds. *G3-Genes Genomes* **5**:113-122.
- Yu, Z. N., and X. M. Guo. 2003. Genetic linkage map of the eastern oyster *Crassostrea virginica* Gmelin. *Biological Bulletin* **204**:327-338.

- Miles, L. G., S. R. Isberg, T. C. Glenn, S. L. Lance, P. Dalzell, P. C. Thomson, and C. Moran. 2009. A genetic linkage map for the saltwater crocodile (*Crocodylus porosus*). *Bmc Genomics* **10**.
- 92 Miles 2009
- Marra, R. E., J. C. Huang, E. Fung, K. Nielsen, J. Heitman, R. Vilgalys, and T. G. Mitchell. 2004. A genetic linkage map of *Cryptococcus neoformans* variety *neoformans* serotype D (*Filobasidiella neoformans*). *Genetics* **167**:619-631.
- 93 Marra 2004
- Moriguchi, Y., K. Uchiyama, S. Ueno, T. Ujino-Ihara, A. Matsumoto, J. Iwai, D. Miyajima, M. Saito, M. Sato, and Y. Tsumura. 2016. A high-density linkage map with 2560 markers and its application for the localization of the male-sterile genes *ms3* and *ms4* in *Cryptomeria japonica* D. Don. *Tree Genetics & Evolution* **16**:1-12.
- 94 Moriguchi 2016
- Xia, J. H., F. Liu, Z. Y. Zhu, J. J. Fu, J. B. Feng, J. L. Li, and G. H. Yue. 2010. A consensus linkage map of the grass carp (*Ctenopharyngodon idella*) based on microsatellites and SNPs. *Bmc Genomics* **11**.
- 95 Xia 2010
- Diaz, A., M. Fergany, G. Formisano, P. Ziarsolo, J. Blanca, Z. J. Fei, J. E. Staub, J. E. Zalapa, H. E. Cuevas, G. Dace, M. Oliver, N. Boissot, C. Dogimont, M. Pitrat, R. Hofstede, P. van Koert, R. Harel-Beja, G. Tzuri, V. Portnoy, S. Cohen, A. Schaffer, N. Katzir, Y. Xu, H. Y. Zhang, N. Fukino, S. Matsumoto, J. Garcia-Mas, and A. J. Monforte. 2011. A consensus linkage map for molecular markers and Quantitative Trait Loci associated with fruit weight and shape in *Cucumis sativus* L. *Genetics* **187**:115-125.
- 96 Diaz 2011
- Zhu, W. Y., L. Huang, L. Chen, J. T. Yang, J. N. Wu, M. L. Qu, D. Q. Yao, C. L. Guo, H. L. Lian, H. L. He, J. S. Pan, and R. Cai. 2016. A High-Density Genetic Linkage Map for Cucumber (*Cucumis sativus* L.): Based on Specific Length Amplified Fragment (SLAF) Sequencing and QTL Analysis of Fruit Weight and Shape. *Genetics* **198**:115-125.
- 97 Zhu 2016
- Zhang, G. Y., Y. Ren, H. H. Sun, S. G. Guo, F. Zhang, J. Zhang, H. Y. Zhang, Z. C. Jia, Z. J. Fei, Y. Xu, and H. Z. Li. 2015. A high-density genetic map for anchoring genome sequences and identifying QTLs associated with dwarfism in pumpkin (*Cucurbita maxima* Duch.). *Bmc Genomics* **16**.
- 98 Zhang 2015
- Gong, L., M. Pachner, K. Kalai, and T. Lelley. 2008. SSR-based genetic linkage map of *Cucurbita moschata* and its synteny with *Cucurbita pepo*. *Genetics* **178**:115-125.
- 99 Gong 2008
- Montero-Pau, J., J. Blanca, C. Esteras, E. M. Martínez-Pérez, P. Gómez, A. J. Monforte, J. Cañizares, and B. Picó. 2017. An SNP-based saturated genetic map and QTL analysis of fruit-related traits in Zucchini using a high-density linkage map. *Genetics* **198**:115-125.
- 100 Montero-Pau 2017
- Hickner, P. V., A. Mori, D. D. Chadee, and D. W. Severson. 2013. Composite Linkage Map and Enhanced Genome Map for *Culex pipiens* Complex Mosquitoes. *Journal of Heredity* **104**:649-655.
- 101 Hickner 2013
- Hansson, B., M. Ljungqvist, D. A. Dawson, J. C. Mueller, J. Olano-Marin, H. Ellegren, and J. A. Nilsson. 2010. Avian genome evolution: insights from a linkage map of the blue tit (*Cyanistes caeruleus*). *Heredity* **104**:67-78.
- 102 Hansson 2010
- Portis, E., G. Mauromicale, R. Mauro, A. Acquadro, D. Scaglione, and S. Lanteri. 2009. Construction of a reference molecular linkage map of globe artichoke (*Cynara cardunculus* var. *scolymus*). *Theoretical and Applied Genetics* **119**:115-125.
- 103 Portis 2009
- Harris-Shultz, K. R., B. M. Schwartz, W. W. Hanna, and J. A. Brady. 2010. Development, Linkage Mapping, and Use of Microsatellites in Bermudagrass. *Journal of the American Society for Horticultural Science* **135**:511-520.
- 104 Harris-Shultz 2010
- Song, W. T., Y. Z. Li, Y. W. Zhao, Y. Liu, Y. Z. Niu, R. Y. Pang, G. D. Miao, X. L. Liao, C. W. Shao, F. T. Gao, and S. L. Chen. 2012. Construction of a High-Density Microsatellite Genetic Linkage Map and Mapping of Sexual and Growth-Related Traits in Half-Smooth Tongue Sole (*Cynoglossus semilaevis*). *Genetics* **190**:115-125.
- 105 Song 2012
- Zhao, L., Y. Zhang, P. F. Ji, X. F. Zhang, Z. X. Zhao, G. Y. Hou, L. H. Huo, G. M. Liu, C. Li, P. Xu, and X. W. Sun. 2013. A Dense Genetic Linkage Map for Common Carp and Its Integration with a BAC-Based Physical Map. *Plos One* **8**:1-12.
- 106 Zhao 2013
- Zhao, X., L. Huang, X. Zhang, J. Wang, D. Yan, J. Li, L. Tang, X. Li, and T. Shi. 2016. Construction of high-density genetic linkage map and identification of flowering-time QTLs in orchardgrass using SSRs and SLAF-seq. *Scientific Data* **3**:1-12.
- 107 Zhao 2016
- Bradley, K. M., J. P. Breyer, D. B. Melville, K. W. Broman, E. W. Knapik, and J. R. Smith. 2011. An SNP-Based Linkage Map for Zebrafish Reveals Sex Determination Loci. *Genetics* **187**:115-125.
- 108 Bradley 2011
- Dukic, M., D. Berner, M. Roesti, C. R. Haag, and D. Ebert. 2016. A high-density genetic map reveals variation in recombination rate across the genome of the common carp (*Cyprinus carpio* L.). *Genetics* **198**:115-125.
- 109 Dukic 2016

- Cristescu, M. E. A., J. K. Colbourne, J. Radivojc, and M. Lynch. 2006. A micro satellite-based genetic linkage map of the waterflea, *Daphnia pulex*: On the prospect of crustacean genomics. *Genomics* **88**:415-430.
- 110 Cristescu 2006
- Cavagnaro, P. F., M. Iorizzo, M. Yildiz, D. Senalik, J. Parsons, S. Ellison, and P. W. Simon. 2014. A gene-derived SNP-based high resolution linkage map of carrot including the location of QTL conditioning root and leaf anthocyanin. *Genetics* **192**:115-125.
- 111 Cavagnaro 2014
- Yagi, M., T. Yamamoto, S. Isobe, H. Hirakawa, S. Tabata, K. Tanase, H. Yamaguchi, and T. Onozaki. 2013. Construction of a reference genetic linkage map for carnation (*Dianthus caryophyllus* L.). *Bmc Genomics* **14**:1-12.
- 112 Yagi 2013
- Chistiakov, D. A., C. S. Tsigenopoulos, J. Lagnel, Y. M. Guo, B. Hellemans, C. S. Haley, F. A. M. Volckaert, and G. Kotoulas. 2008. A combined AFLP and microsatellite linkage map and pilot comparative genomic analysis of European sea bass *Dicentrarchus labrax* L. *Animal Genetics* **39**:623-634.
- 113 Chistiakov 2008
- Stocker, A. J., B. B. Rusuwa, M. J. Blacket, F. D. Frentiu, M. Sullivan, B. R. Foley, S. Beatson, A. A. Hoffmann, and S. F. Chenoweth. 2012. Physical and Linkage Maps for *Drosophila serrata*, a Model Species for Studies of Clinal Adaptation and Sexual Selection. *G3-Genes Genomes Genetics* **2**:287-297.
- 114 Stocker 2012
- Heesch, S., G. Y. Cho, A. F. Peters, G. Le Corguille, C. Falentin, G. Boutet, S. Coedel, C. Jubin, G. Samson, E. Corre, S. M. Coelho, and J. M. Cock. 2010. A sequence-tagged genetic map for the brown alga *Ectocarpus siliculosus* provides large-scale assembly of the genome sequence. *New Phytologist* **187**:105-115.
- 115 Heesch 2010
- Blake, D. P., R. Oakes, and A. L. Smith. 2011. A genetic linkage map for the apicomplexan protozoan parasite *Eimeria maxima* and comparison with *Eimeria tenella*. *International Journal for Parasitology* **41**:263-270.
- 116 Blake 2011
- Shirley, M. W., and D. A. Harvey. 2000. A genetic linkage map of the apicomplexan protozoan parasite *Eimeria tenella*. *Genome Research* **10**:1587-1597.
- 117 Shirley 2000
- Ting, N. C., Z. Yaakub, K. Kamaruddin, S. Mayes, F. Massawe, R. Sambanthamurthi, J. Jansen, L. E. T. Low, M. Ithnin, A. Kushairi, X. Arulandoo, R. Rosli, K. L. Chan, N. Amiruddin, K. Sriharan, C. C. Lim, R. Nookiah, M. D. Amiruddin, and R. Singh. 2016. Fine-mapping and cross-validation of QTLs linked to fatty acid composition in multiple independent populations of *Canarium littorale*. *PLoS One* **11**:e0152111.
- 118 Ting 2016
- Montoya, C., R. Lopes, A. Flori, D. Cros, T. Cuellar, M. Summo, S. Espeout, R. Rivallan, A. M. Risterucci, D. Bittencourt, J. R. Zambrano, W. H. Alarcon, P. Villeneuve, M. Pina, B. Nouy, P. Amblard, E. Ritter, T. Leroy, and N. Billotte. 2013. Quantitative trait loci (QTLs) analysis of palm oil fatty acid composition in an interspecific pseudo-backcross from *Elaeis oleifera* (HBK) × *Elaeis guineensis* (Jacq.). *PLoS One* **8**:e74111.
- 119 Montoya 2013
- Mott, I. W., S. R. Larson, T. A. Jones, J. G. Robins, K. B. Jensen, and M. D. Peel. 2011. A molecular genetic linkage map identifying the St and H subgenomes of *Elymus* (Poaceae: Triticeae) wheatgrass. *Genome* **54**:819-830.
- 120 Mott 2011
- Dor, L., A. Shirak, S. Gorshkov, M. R. Band, A. Korol, Y. Ronin, A. Curzon, G. Hulata, E. Seroussi, and M. Ron. 2014. Construction of a Microsatellites-Based Linkage Map for the White Grouper (*Epinephelus aeneus*). *G3-Genes Swinburne, J. E., M. Bournsnell, G. Hill, L. Pettitt, T. Allen, B. Chowdhary, T. Hasegawa, M. Kurosawa, T. Leeb, S. Mashima, J. R. Mickelson, T. Raudsepp, T. Tozaki, and M. Binns. 2006. Single linkage group per chromosome genetic linkage map for the horse, based on two three-*
- 121 Dor 2014
- Zheng, Y. Q., H. L. Guo, G. Z. Zang, and J. X. Liu. 2013. Genetic linkage maps of centipedegrass *Eremochloa ophiuroides* (Munro) Hack based on sequence-related amplified polymorphism and expressed sequence tag-simple sequence repeat markers. *Scientia Horticulturae* **156**:86-92.
- 122 Zheng 2013
- Fukuda, S., K. Ishimoto, S. Sato, S. Terakami, N. Hiehata, and T. Yamamoto. 2016. A high-density genetic linkage map of bronze loquat based on SSR and RAPD markers. *Tree Genetics & Genomes* **12**:1-12.
- 124 Fukuda 2016
- Cui, Z., M. Hui, Y. Liu, C. Song, X. Li, Y. Li, L. Liu, G. Shi, S. Wang, F. Li, X. Zhang, C. Liu, J. Xiang, and K. H. Chu. 2015. High-density linkage mapping aided by transcriptomics documents ZW sex determination system in the Chinese mitten crab *Eriocheir sinensis*. *Heredity* **115**:206-215.
- 125 Cui 2015
- Rondeau, E. B., D. R. Minkley, J. S. Leong, A. M. Messmer, J. R. Jantzen, K. R. von Schalburg, C. Lemon, N. H. Bird, and B. F. Koop. 2014. The Genome and Linkage Map of the Northern Pike (*Esox lucius*): Conserved Synteny Revealed between the Salmonid Sister Group and the Neoteleostei. *Plos One* **9**:e100098.
- 126 RONDEAU 2014

- 127 Agrama 2002 Agrama, H. A., T. L. George, and S. F. Salah. 2002. Construction of genome map for *Eucalyptus camaldulensis* DEHN. *Silvae Genetica* **51**:201-206.
- 128 Hudson 2012 Hudson, C. J., J. S. Freeman, A. R. K. Kullán, C. D. Petrolí, C. P. Sansaloni, A. Kilian, F. Detering, D. Grattapaglia, B. M. Potts, A. A. Myburg, and R. E. Vaillancourt. 2012. A reference linkage map for *Eucalyptus*. *Bmc Genomics*
- 129 Li 2015 Li, F. G., C. P. Zhou, Q. J. Weng, M. Li, X. L. Yu, Y. Guo, Y. Wang, X. H. Zhang, and S. M. Gan. 2015. Comparative Genomics Analyses Reveal Extensive Chromosome Colinearity and Novel Quantitative Trait Loci in
- 130 Li 2015 Li, F. G., C. P. Zhou, Q. J. Weng, M. Li, X. L. Yu, Y. Guo, Y. Wang, X. H. Zhang, and S. M. Gan. 2015. Comparative Genomics Analyses Reveal Extensive Chromosome Colinearity and Novel Quantitative Trait Loci in
- 131 Li 2014 Li, Y., D. W. Wang, Z. Q. Li, J. K. Wei, C. F. Jin, and M. H. Liu. 2014. A Molecular Genetic Linkage Map of *Eucommia ulmoides* and Quantitative Trait Loci (QTL) Analysis for Growth Traits. *International Journal of Molecular*
- 132 Yabe 2014 Yabe, S., T. Hara, M. Ueno, H. Enoki, T. Kimura, S. Nishimura, Y. Yasui, R. Ohsawa, and H. Iwata. 2014. Rapid genotyping with DNA micro-arrays for high-density linkage mapping and QTL mapping in common buckwheat (*Fagopyrum esculentum* Moench). *Breeding Science* **64**:291-299.
- 133 Li 2016 Li, G., L. W. Hillier, R. A. Grahn, A. V. Zimin, V. A. David, M. Menotti-Raymond, R. Middleton, S. Hannah, S. Hendrickson, A. Makunin, S. J. O'Brien, P. Minx, R. K. Wilson, L. A. Lyons, W. C. Warren, and W. J. Murphy. 2016. A High-Resolution SNP Array-Based Linkage Map Anchors a New Domestic Cat Draft Genome Assembly and Provides Detailed Patterns of
- 134 Wang 2012 Wang, W., Y. Tian, J. Kong, X. Li, X. Liu, and C. Yang. 2012. Integration genetic linkage map construction and several potential QTLs mapping of Chinese shrimp (*Fenneropenaeus chinensis*) based on three types of
- 135 Dierking 2015 Dierking, R., P. Azhaguvel, R. Kallenbach, M. Saha, J. Bouton, K. Chekhovskiy, D. Kopecky, and A. Hopkins. 2015. Linkage Maps of a Mediterranean x Continental Tall Fescue Population and their Comparative
- 136 Backstrom 2008 Backstrom, N., N. Karaiskou, E. H. Leder, L. Gustafsson, C. R. Primmer, A. Qvarnstrom, and H. Ellegren. 2008. A gene-based genetic linkage map of the collared flycatcher (*Ficedula albicollis*) reveals extensive synteny and gene-order conservation during 100 million years of avian evolution. *Genetics*
- 137 Mahoney 2016 Mahoney, L. L., D. J. Sargent, F. Abebe-Akele, D. J. Wood, J. A. Ward, N. V. Bassil, J. F. Hancock, K. M. Folta, and T. M. Davis. 2016. A High-Density Linkage Map of the Ancestral Diploid Strawberry, *Fragaria iinumae*,
- 138 Davik 2015 Davik, J., D. J. Sargent, M. B. Brurberg, S. Lien, M. Kent, and M. Alsheikh. 2015. A ddRAD Based Linkage Map of the Cultivated Strawberry, *Fragaria*
- 139 Sargent 2016 Sargent, D. J., Y. Yang, N. Surbanovski, L. Bianco, M. Buti, R. Velasco, L. Giongo, and T. M. Davis. 2016. HaploSNP affinities and linkage map positions illuminate subgenome composition in the octoploid, cultivated
- 140 DeVos 2007 De Vos, L., A. A. Myburg, M. J. Wingfield, A. E. Desjardins, T. R. Gordon, and B. D. Wingfield. 2007. Complete genetic linkage maps from an interspecific cross between *Fusarium circinatum* and *Fusarium subglutinans*. *Fungal*
- 141 Lee 2008 Lee, J., J. E. Jurgenson, J. F. Leslie, and R. L. Bowden. 2008. Alignment of genetic and physical maps of *Gibberella zeae*. *Applied and Environmental*
- 142 Teunissen 2003 Teunissen, H. A. S., M. Rep, P. M. Houterman, B. J. C. Cornelissen, and M. A. Haring. 2003. Construction of a mitotic linkage map of *Fusarium oxysporum* based on Foxy-AFLPs. *Molecular Genetics and Genomics*
- 143 Jurgenson 2002 Jurgenson, J. E., K. A. Zeller, and J. F. Leslie. 2002. Expanded genetic map of *Gibberella moniliformis* (*Fusarium verticillioides*). *Applied and*
- 144 Hubert 2010 Hubert, S., B. Higgins, T. Borza, and S. Bowman. 2010. Development of a SNP resource and a genetic linkage map for Atlantic cod (*Gadus morhua*).
- 145 Pengelly 2016 Pengelly, R. J., A. A. Gheyas, R. Kuo, E. Mossotto, E. G. Seaby, D. W. Burt, S. Ennis, and A. Collins. 2016. Commercial chicken breeds exhibit highly divergent patterns of linkage disequilibrium. *Heredity* **117**:375-382.
- 146 Rastas 2016 Rastas, P., F. C. F. Calboli, B. C. Guo, T. Shikano, and J. Merila. 2016. Construction of Ultradense Linkage Maps with Lep-MAP2: Stickleback F-2 Recombinant Crosses as an Example. *Genome Biology and Evolution* **8**:78-



- Nakatsuka, T., E. Yamada, M. Saito, T. Hikage, Y. Ushiku, and M. Nishihara. 2012. Construction of the first genetic linkage map of Japanese gentian (*Gentianaceae*). *Bmc Genomics* **13**.
- 147 Nakatsuka 2012
- van der Voort, J., H. J. van Eck, P. M. van Zandvoort, H. Overmars, J. Helder, and J. Bakker. 1999. Linkage analysis by genotyping of sibling populations: a genetic map for the potato cyst nematode constructed using a "pseudo-F2" mapping strategy. *Molecular and General Genetics* **261**:1021-1031.
- 148 vanderVoort 1999
- Song, Q. J., J. Jenkins, G. F. Jia, D. L. Hyten, V. Pantalone, S. A. Jackson, J. Schmutz, and P. B. Cregan. 2016. Construction of high resolution genetic linkage maps to improve the soybean genome sequence assembly
- 149 Song 2016
- Shi, Y. Z., W. T. Li, A. G. Li, R. H. Ge, B. C. Zhang, J. Z. Li, G. P. Liu, J. W. Li, A. Y. Liu, H. H. Shang, J. W. Gong, W. K. Gong, Z. M. Yang, F. Y. Tang, Z. Liu, W. P. Zhu, J. X. Jiang, X. N. Yu, T. Wang, W. Wang, T. T. Chen, K. B. Wang, Z. S. Zhang, and Y. L. Yuan. 2015. Constructing a high-density linkage map for *Gossypium hirsutum* x *Gossypium barbadense* and identifying QTLs
- 150 Shi 2016
- Jia, X. Y., C. Y. Pang, H. L. Wei, H. T. Wang, Q. F. Ma, J. L. Yang, S. S. Cheng, J. J. Su, S. L. Fan, M. Z. Song, N. Wusiman, and S. X. Yu. 2016. High-density linkage map construction and QTL analysis for earliness-related traits
- 151 Jia 2016
- Wang, Z. N., D. Zhang, X. Y. Wang, X. Tan, H. Guo, and A. H. Paterson. 2013. A Whole-Genome DNA Marker Map for Cotton Based on the D-Genome Sequence of *Gossypium raimondii* L. *G3-Genes Genomes Genetics*
- 152 Wang 2013
- Hou, M. Y., C. P. Cai, S. W. Zhang, W. Z. Guo, T. Z. Zhang, and B. L. Zhou. 2013. Construction of microsatellite-based linkage map and mapping of
- 153 Hou 2013
- nectarilessness and hairiness genes in *Gossypium tomentosum*. *Journal of*
- Ren, P., W. Z. Peng, W. W. You, Z. K. Huang, Q. Guo, N. Chen, P. R. He, J. W. Ke, J. C. Gwo, and C. H. Ke. 2016. Genetic mapping and quantitative trait loci analysis of growth-related traits in the small abalone *Haliotis diversicolor*
- 154 Ren 2016
- using restriction-site-associated DNA sequencing. *Aquaculture* **454**:163-170.
- Vervalle, J., J. A. Hepple, S. Jansen, J. Du Plessis, P. Z. Wang, C. Rhode, and R. Roodt-Wilding. 2013. INTEGRATED LINKAGE MAP OF HALIOTIS
- 155 Vervalle 2013
- MIDAE LINNAEUS BASED ON MICROSATELLITE AND SNP MARKERS.
- Henning, F., H. J. Lee, P. Franchini, and A. Meyer. 2014. Genetic mapping of horizontal stripes in Lake Victoria cichlid fishes: benefits and pitfalls of using
- 156 Henning 2017
- RAD markers for dense linkage mapping. *Molecular Ecology* **23**:5224-5240.
- Henning, F., G. Machado-Schiaffino, L. Baumgarten, and A. Meyer. 2017.
- 157 Henning 2014
- Genetic dissection of adaptive form and function in rapidly-speciating cichlid
- Celik, I., S. Bodur, A. Frary, and S. Doganlar. 2016. Genome-wide SNP
- 158 Celik 2016
- discovery and genetic linkage map construction in sunflower (*Helianthus annuus* L.) using a genotyping by sequencing (GBS) approach. *Molecular*
- Davey, J. W., M. Chouteau, S. L. Barker, L. Maroja, S. W. Baxter, F. Simpson, M. Joron, J. Mallet, K. K. Dasmahapatra, and C. D. Jiggins. 2016.
- 159 Davey 2016
- Major Improvements to the *Heliconius melpomene* Genome Assembly Used to Confirm 10 Chromosome Fusion Events in 6 Million Years of Butterfly
- Atibalentja, N., S. Bekal, L. L. Domier, T. L. Niblack, G. R. Noel, and K. N. Lambert. 2005. A genetic linkage map of the soybean cyst nematode
- 160 Atibalentja 2005
- Heterodera glycines*. *Molecular Genetics and Genomics* **273**:273-281.
- Shearman, J. R., D. Sangsrakru, N. Jomchai, P. Ruang-Areerate, C. Sonthirod, C. Naktang, K. Theerawattanasuk, S. Tragoonrung, and S. Tangphatsornruang. 2015. SNP Identification from RNA Sequencing and
- 161 Shearman 2015
- Linkage Map Construction of Rubber Tree for Anchoring the Draft Genome.
- Chen, M. X., C. L. Wei, J. M. Qi, X. B. Chen, J. G. Su, A. Q. Li, A. F. Tao, and W. R. Wu. 2011. Genetic linkage map construction for kenaf using SRAP,
- 162 Chen 2011
- ISSR and RAPD markers. *Plant Breeding* **130**:679-687.
- Shirasawa, K., M. L. Hand, S. T. Henderson, T. Okada, S. D. Johnson, J. M. Taylor, A. Spriggs, H. Siddons, H. Hirakawa, S. Isobe, S. Tabata, and A. M. G. Koltunow. 2015. A reference genetic linkage map of apomictic *Hieracium*
- 163 Shirasawa 2015
- species based on expressed markers derived from developing ovule
- Palaiokostas, C., M. Bekaert, A. Davie, M. E. Cowan, M. Oral, J. B. Taggart, K. Gharbi, B. J. McAndrew, D. J. Penman, and H. Migaud. 2013. Mapping the
- 164 Palaiokostas 2013
- sex determination locus in the Atlantic halibut (*Hippoglossus hippoglossus*)

- Zhou, H., S. H. Liu, Y. J. Liu, Y. X. Liu, J. You, M. Deng, J. Ma, G. D. Chen, Y. M. Wei, C. J. Liu, and Y. L. Zheng. 2016. Mapping and validation of major quantitative trait loci for kernel length in wild barley (*Hordeum vulgare* ssp. Henning, J. A., D. H. Gent, M. C. Twomey, M. S. Townsend, N. J. Pitra, and P. D. Matthews. 2015. Precision QTL mapping of downy mildew resistance in hop (*Humulus lupulus* L.). *Euphytica* **202**:487-498.
- 165 Zhou 2016
- Brelsford, A., C. Dufresnes, and N. Perrin. 2016. High-density sex-specific linkage maps of a European tree frog (*Hyla arborea*) identify the sex chromosome without information on offspring sex. *Heredity* **116**:177-181.
- 166 Henning 2015
- 167 Brelsford 2016
- Guo, W. J., J. G. Tong, X. M. Yu, C. K. Zhu, X. Feng, B. D. Fu, S. P. He, F. Z. Zeng, X. H. Wang, H. Y. Liu, and L. S. Liu. 2013. A second generation genetic linkage map for silver carp (*Hypophthalmichthys molitrix*) using microsatellite
- 168 Guo 2013
- Bai, Z. Y., X. K. Han, X. J. Liu, Q. Q. Li, and J. L. Li. 2016. Construction of a high-density genetic map and QTL mapping for pearl quality-related traits in *Hyriopsis cumingii*. *Scientific Reports* **6**.
- 169 Bai 2016
- Liu, S., Y. Li, Z. Qin, X. Geng, L. Bao, L. Kaltenboeck, H. Kucuktas, R. Dunham, and Z. Liu. 2016. High-density interspecific genetic linkage mapping provides insights into genomic incompatibility between channel catfish and
- 170 Liu 2016
- Zhao, N., X. X. Yu, Q. Jie, H. Li, H. Li, J. Hu, H. Zhai, S. Z. He, and Q. C. Liu. 2013. A genetic linkage map based on AFLP and SSR markers and mapping of QTL for dry-matter content in sweetpotato. *Molecular Breeding* **32**:807-820.
- 171 Zhao 2013
- Ullmann, A. J., J. Piesman, M. C. Dolan, and W. C. Black. 2003. A preliminary linkage map of the hard tick, *Ixodes scapularis*. *Insect Molecular Biology*
- 172 Ullmann 2003
- Wu, P. Z., C. P. Zhou, S. F. Cheng, Z. Y. Wu, W. J. Lu, J. L. Han, Y. B. Chen, Y. Chen, P. X. Ni, Y. Wang, X. Xu, Y. Huang, C. Song, Z. W. Wang, N. Shi, X. D. Zhang, X. H. Fang, Q. Yang, H. W. Jiang, Y. P. Chen, M. R. Li, Y. Wang, F. Chen, J. Wang, and G. J. Wu. 2015. Integrated genome sequence and linkage map of physic nut (*Jatropha curcas* L.), a biodiesel plant. *Plant*
- 173 Wu 2015
- Zhu, Y. F., Y. F. Yin, K. Q. Yang, J. H. Li, Y. L. Sang, L. Huang, and S. Fan. 2015. Construction of a high-density genetic map using specific length amplified fragment markers and identification of a quantitative trait locus for
- 174 Zhu 2015
- anthracnose resistance in walnut (*Juglans regia* L.). *Bmc Genomics* **16**.
- Kanamori, A., Y. Sugita, Y. Yuasa, T. Suzuki, K. Kawamura, Y. Uno, K. Kamimura, Y. Matsuda, C. A. Wilson, A. Amores, J. H. Postlethwait, K. Suga, and Y. Sakakura. 2016. A Genetic Map for the Only Self-Fertilizing
- 175 Kanomori 2016
- Robinson, N., M. Baranski, K. Das Mahapatra, J. N. Saha, S. Das, J. Mishra, P. Das, M. Kent, M. Arnyasi, and P. K. Sahoo. 2014. A linkage map of transcribed single nucleotide polymorphisms in rohu (*Labeo rohita*) and QTL
- 176 Robinson 2014
- associated with resistance to *Aeromonas hydrophila*. *Bmc Genomics* **15**.
- Truco, M. J., H. Ashrafi, A. Kozik, H. van Leeuwen, J. Bowers, S. R. C. Wo, K. Stoffel, H. Q. Xu, T. Hill, A. Van Deynze, and R. W. Michelmore. 2013. An
- 177 Truco 2013
- Ultra-High-Density, Transcript-Based, Genetic Map of Lettuce. *G3-Genes*
- Ao, J. Q., J. Li, X. X. You, Y. N. Mu, Y. Ding, K. Q. Mao, C. Bian, P. F. Mu, Q. Shi, and X. H. Chen. 2015. Construction of the High-Density Genetic Linkage Map and Chromosome Map of Large Yellow Croaker (*Larimichthys crocea*).
- 178 Ao 2015
- International Journal of Molecular Sciences* **16**:26237-26248.
- Guan, C. Y., H. G. Zhang, L. Zhang, X. F. Li, J. F. Deng, and T. B. Jiang. 2011. CONSTRUCTION OF GENETIC LINKAGE MAPS OF LARCH (*LARIX KAEMPFERI* x *LARIX GMELINI*) BY RAPD MARKERS AND MAPPING OF
- 179 Guan 2011
- QTLs FOR LARCH. *Biotechnology & Biotechnological Equipment* **25**:2197-
- Wang, L., B. Bai, P. Liu, S. Q. Huang, Z. Y. Wan, E. Chua, B. Ye, and G. H.
- 180 Wang 2017
- Yue. 2017. Construction of high-resolution recombination maps in Asian
- Sudheesh, S., M. S. Rodda, J. Davidson, M. Javid, A. Stephens, A. T. Slater, N. O. I. Cogan, J. W. Forster, and S. Kaur. 2016. SNP-Based Linkage
- 181 Sudheesh 2016
- Mapping for Validation of QTLs for Resistance to *Ascochyta* Blight in Lentil.
- Wang, W. J., H. P. Wang, H. Yao, G. K. Wallat, L. G. Tiu, and Q. Y. Wang. 2010. A first genetic linkage map of bluegill sunfish (*Lepomis macrochirus*)
- 182 Wang 2010
- using AFLP markers. *Aquaculture International* **18**:825-835.
- Hawthorne, D. J. 2001. AFLP-based genetic linkage map of the Colorado
- 183 Hawthorne 2001
- potato beetle *Leptinotarsa decemlineata*: Sex chromosomes and a pyrethroid-resistance candidate gene. *Genetics* **158**:695-700.

- Cloutier, S., R. Ragupathy, E. Miranda, N. Radovanovic, E. Reimer, A. Walichnowski, K. Ward, G. Rowland, S. Duguid, and M. Banik. 2012.
- 184 Cloutier 2012 Integrated consensus genetic and physical maps of flax (*Linum usitatissimum*)  
Yu, Y., X. J. Zhang, J. B. Yuan, F. H. Li, X. H. Chen, Y. Z. Zhao, L. Huang, H. K. Zheng, and J. H. Xiang. 2015. Genome survey and high-density genetic
- 185 Yu 2015 map construction provide genomic and genetic resources for the Pacific White  
Guan, X. L., M. Hirata, C. L. Ding, N. X. Xu, N. Yuyama, L. B. Tan, Y. C. Fu, J. P. Wang, and H. W. Cai. 2014. Genetic linkage map of *Lolium multiflorum*  
Lam. constructed from a BC1 population derived from an interspecific
- 186 Guan 2014 hybridization, *L. multiflorum* x *Lolium temulentum* L. x *L. temulentum*.  
Velmurugan, J., E. Mollison, S. Barth, D. Marshall, L. Milne, C. J. Creevey, B. Lynch, H. Meally, M. McCabe, and D. Milbourne. 2016. An ultra-high density  
genetic linkage map of perennial ryegrass (*Lolium perenne*) using genotyping
- 187 Velmurugan 2016 by sequencing (GBS) based on a reference shotgun genome assembly.  
Wang, X. W., S. Sato, S. Tabata, and S. Kawasaki. 2008. A High-density
- 188 Wang 2008 Linkage Map of *Lotus japonicus* Based on AFLP and SSR Markers. *DNA*  
Berdan, E. L., G. M. Kozak, R. Ming, A. L. Rayburn, R. Kiehart, and R. C. Fuller. 2014. Insight Into Genomic Changes Accompanying Divergence:  
Genetic Linkage Maps and Synteny of *Lucania goodei* and *L. parva* Reveal a
- 189 Berdan 2014 Robertsonian Fusion. *G3-Genes Genomes Genetics* **4**:1363-1372.  
Berdan, E. L., G. M. Kozak, R. Ming, A. L. Rayburn, R. Kiehart, and R. C. Fuller. 2014. Insight Into Genomic Changes Accompanying Divergence:  
Genetic Linkage Maps and Synteny of *Lucania goodei* and *L. parva* Reveal a
- 190 Berdan 2014 Robertsonian Fusion. *G3-Genes Genomes Genetics* **4**:1363-1372.  
Wu, H., X. He, H. Gong, S. Luo, M. Li, J. Chen, C. Zhang, T. Yu, W. Huang, and J. Luo. 2016. Genetic Linkage Map Construction and QTL Analysis of
- 191 Wu 2016 Two Interspecific Reproductive Isolation Traits in Sponge Gourd. *Frontiers in*  
Vipin, C. A., D. J. Luckett, J. D. I. Harper, G. J. Ash, A. Kilian, S. R. Ellwood, H. T. T. Phan, and H. Raman. 2013. Construction of integrated linkage map of
- 192 Vipin 2013 a recombinant inbred line population of white lupin (*Lupinus albus* L.).  
Yang, H. A., Y. Tao, Z. Q. Zheng, D. Shao, Z. Z. Li, M. W. Sweetingham, B. J. Buirchell, and C. D. Li. 2013. Rapid development of molecular markers by  
next-generation sequencing linked to a gene conferring phomopsis stem
- 193 Yang 2013 blight disease resistance for marker-assisted selection in lupin (*Lupinus*  
Rogers, J., R. Garcia, W. Shelledy, J. Kaplan, A. Arya, Z. Johnson, M. Bergstrom, L. Novakowski, P. Nair, A. Vinson, D. Newman, G. Heckman, and J. Cameron. 2006. An initial genetic linkage map of the rhesus macaque
- 194 Rogers 2006 (*Macaca mulatta*) genome using human microsatellite loci. *Genomics* **87**:30-  
Wang, C. W., L. Webley, K. J. Wei, M. J. Wakefield, H. R. Patel, J. E. Deakin, A. Alsop, J. A. M. Graves, D. W. Cooper, F. W. Nicholas, and K. R. Zenger.
- 195 Wang 2011 2011. A second-generation anchored genetic linkage map of the tammar  
Zheng, Y., G. Zhang, F. C. Lin, Z. H. Wang, G. L. Jin, L. Yang, Y. Wang, X. Chen, Z. H. Xu, X. Q. Zhao, H. K. Wang, J. P. Lu, G. D. Lu, and W. R. Wu.  
2008. Development of microsatellite markers and construction of genetic map
- 196 Zheng 2008 in rice blast pathogen *Magnaporthe grisea*. *Fungal Genetics and Biology*  
Di Pierro, E. A., L. Gianfranceschi, M. Di Guardo, H. J. J. Koehorst-van Putten, J. W. Kruisselbrink, S. Longhi, M. Troggio, L. Bianco, H. Muranty, G. Pagliarani, S. Tartarini, T. Letschka, L. L. Luis, L. Garkava-Gustavsson, D. Micheletti, M. Bink, R. E. Voorrips, E. Aziz, R. Velasco, F. Laurens, and W. E. van de Weg. 2016. A high-density, multi-parental SNP genetic map on apple
- 197 DiPierro 2016 validates a new mapping approach for outcrossing species. *Horticulture*  
Liu, Z. C., D. E. Bao, D. L. Liu, and X. S. Chen. 2016. Construction of a  
genetic linkage map and identification of QTL associated with growth traits in
- 198 Liu 2016 *Malus sieversii*. *Journal of Environmental Biology* **37**:1043-1047.  
Clark, M. D., C. A. Schmitz, U. R. Rosyara, J. J. Luby, and J. M. Bradeen.  
2014. A consensus 'Honeycrisp' apple (*Malus x domestica*) genetic linkage
- 199 Clark 2014 map from three full-sib progeny populations. *Tree Genetics & Genomes*  
Luo, C., B. Shu, Q. S. Yao, H. X. Wu, W. T. Xu, and S. B. Wang. 2016.  
Construction of a High-Density Genetic Map Based on Large-Scale Marker
- 200 Luo 2016 Development in Mango Using Specific-Locus Amplified Fragment Sequencing

- Alaba, O. A., J. V. Bredeson, C. N. Egesi, W. Esuma, L. Ezenwaka, M. E. Ferguson, C. M. Ha, M. Hall, L. Herselman, A. Ikpan, E. Kafiriti, E. Kanju, F. Kapinga, A. Karugu, R. Kawuki, B. Kimata, P. Kimurto, P. Kulakow, H. Kulembeka, P. Kusolwa, J. B. Lyons, E. Masumba, A. van de Merwe, G. Mkamilo, A. A. Myburg, A. Nwaogu, I. Nzuki, B. Olasanmi, E. Okogbenin, O. Onyegbule, J. Owuoché, A. Pariyo, S. E. Prochnik, I. Y. Rabbi, D. S. Rokhsar, S. Rounsley, K. Salum, K. S. Shuaibu, C. Sichalwe, M. Stephen, and Icgmc. 2015. High-Resolution Linkage Map and Chromosome-Scale Genome
- 201 Alaba 2015 2015. High-Resolution Linkage Map and Chromosome-Scale Genome  
Lu, X., S. Luan, L. Y. Hu, Y. Mao, Y. Tao, S. P. Zhong, and J. Kong. 2016. High-resolution genetic linkage mapping, high-temperature tolerance and growth-related quantitative trait locus (QTL) identification in *Marsipenaues japonicus*. *Molecular Genetics and Genomics* **291**:1391-1405.
- 202 Lu 2016  
Li, X. H., Y. L. Wei, A. Acharya, Q. Z. Jiang, J. M. Kang, and E. C. Brummer. 2014. A Saturated Genetic Linkage Map of Autotetraploid Alfalfa (*Medicago sativa* L.) Developed Using Genotyping-by-Sequencing Is Highly Syntenous with the *Medicago truncatula* Genome. *G3-Genes Genomes Genetics* **4**:1971-1977.
- 203 Li 2014  
Gorton, A. J., K. D. Heath, M.-L. Pilet-Nayel, A. Baranger, and J. R. Stinchcombe. 2012. Mapping the Genetic Basis of Symbiotic Variation in Legume-Rhizobium Interactions in *Medicago truncatula*. *G3: Genes, Genomes, and Genetics* **2**:1971-1977.
- 204 Gorton 2012  
Anderson, C., M. A. Khan, A. M. Catanzariti, C. A. Jack, A. Nemri, G. J. Lawrence, N. M. Upadhyaya, A. R. Hardham, J. G. Ellis, P. N. Dodds, and D. A. Jones. 2016. Genome analysis and avirulence gene cloning using a high-density RADseq linkage map of the flax rust fungus, *Melampsora lini*. *BMC Plant Biology* **16**:1-12.
- 205 Anderson 2016  
Aslam, M. L., J. W. M. Bastiaansen, R. Crooijmans, A. Vereijken, H. J. Megens, and M. A. M. Groenen. 2010. A SNP based linkage map of the turkey genome reveals multiple intrachromosomal rearrangements between the Turkey and Chicken genomes. *BMC Genomics* **11**:1-12.
- 206 Aslam 2010  
Thomas, V. P., S. L. Fudali, J. E. Schaff, Q. L. Liu, E. H. Scholl, C. H. Opperman, D. M. Bird, and V. M. Williamson. 2012. A Sequence-Anchored Linkage Map of the Plant-Parasitic Nematode *Meloidogyne hapla* Reveals Exceptionally High Genome-Wide Recombination. *G3-Genes Genomes Genetics* **2**:1971-1977.
- 207 Thomas 2012  
Nietlisbach, P., G. Camenisch, T. Bucher, J. Slate, L. F. Keller, and E. Postma. 2015. A microsatellite-based linkage map for song sparrows (*Melospiza melodia*). *Molecular Ecology Resources* **15**:1486-1496.
- 208 Nietlisbach 2015  
O'Quin, C. T., A. C. Drilea, M. A. Conte, and T. D. Kocher. 2013. Mapping of pigmentation QTL on an anchored genome assembly of the cichlid fish, *Melanochromis labialis*. *Genetics* **193**:115-125.
- 209 O'Quin 2013  
McGraw, L. A., J. K. Davis, L. J. Young, and J. W. Thomas. 2011. A genetic linkage map and comparative mapping of the prairie vole (*Microtus pennsylvanicus*). *Genetics* **187**:115-125.
- 210 McGraw 2011  
Holeski, L. M., P. Monahan, B. Koseva, N. McCool, R. L. Lindroth, and J. K. Kelly. 2014. A High-Resolution Genetic Map of Yellow Monkeyflower (*Diurnella aurea*) Identifies Chemical Defense QTLs and Recombination Rate Variation. *G3-Genes Genomes Genetics* **4**:1971-1977.
- 211 Holeski 2014  
Liu, S. Y., L. V. Clark, K. Swaminathan, J. M. Gifford, J. A. Juvik, and E. J. Sacks. 2016. High-density genetic map of *Miscanthus sinensis* reveals inheritance of zebra stripe. *Global Change Biology Bioenergy* **8**:616-630.
- 212 Liu 2016  
Morishima, K., I. Nakayama, and K. Arai. 2008. Genetic linkage map of the loach *Misgurnus anguillicaudatus* (Teleostei : Cobitidae). *Genetica* **132**:227-237.
- 213 Morishima 2008  
Samollow, P. B., N. Gouin, P. Miethke, S. M. Mahaney, M. Kenney, J. L. VandeBerg, J. A. M. Graves, and C. M. Kammerer. 2007. A microsatellite-based, physically anchored linkage map for the gray, short-tailed Opossum (*Monodelphis domestica*). *Chromosome Research* **15**:269-281.
- 214 Samollow 2007  
Hippolyte, I., F. Bakry, M. Seguin, L. Gardes, R. Rivallan, A. M. Risterucci, C. Jenny, X. Perrier, F. Carreel, X. Argout, P. Piffanelli, I. A. Khan, R. N. G. Miller, G. J. Pappas, D. Mbeguie-A-Mbeguie, T. Matsumoto, V. De Bernardinis, E. Huttner, A. Kilian, F. C. Baurens, A. D'Hont, F. Cote, B. Courtois, and J. C. Glaszmann. 2010. A saturated SSR/DArT linkage map of *Triticum aestivum* L. cv. Hereward. *Genetics* **185**:115-125.
- 215 Hippolyte 2010  
Kema, G. H. J., S. B. Goodwin, S. Hamza, E. C. P. Verstappen, J. R. Cavaletto, T. A. J. Van der Lee, M. de Weerd, P. J. M. Bonants, and C. Waalwijk. 2002. A combined amplified fragment length polymorphism and randomly amplified polymorphism DNA genetic linkage map of *Mycosphaerella graminicola*, the septoria tritici leaf blotch pathogen of wheat. *Genetics* **161**:115-125.
- 216 Kema 2002

- Diao, W., M. Mousset, G. J. Horsburgh, C. J. Vermeulen, F. Johannes, L. van de Zande, M. G. Ritchie, T. Schmitt, and L. W. Beukeboom. 2016. Quantitative Trait Locus Analysis of Mating Behavior and Male Sex Pheromones in *Nasonia* Wasps. *G3-Genes Genomes Genetics* **6**:1549-1562.
- 217 Diao 2016 Zhang, Q., L. T. Li, R. VanBuren, Y. L. Liu, M. Yang, L. M. Xu, J. E. Bowers, C. H. Zhong, Y. P. Han, S. H. Li, and R. Ming. 2014. Optimization of linkage mapping strategy and construction of a high-density American lotus linkage map. *Genetics* **196**:103-114.
- 218 Zhang 2014 Liu, Z., H. Zhu, Y. Liu, J. Kuang, K. Zhou, F. Liang, Z. Liu, D. Wang, and W. Ke. 2016. Construction of a high-density, high-quality genetic map of cultivated lotus (*Nelumbo nucifera*) using next-generation sequencing. *Bmc Plant Biology* **16**:1-12.
- 219 Liu 2016 Zhang, S. A., M. Q. Gao, and D. Zaitlin. 2012. Molecular linkage mapping and marker-trait associations with NIRPT, a downy mildew resistance gene in *Nicotiana glauca*. *Frontiers in Plant Science* **3**:1-10.
- 220 Zhang 2012 Gong, D., L. Huang, X. Xu, C. Wang, M. Ren, C. Wang, and M. Chen. 2016. Construction of a high-density SNP genetic map in fluecured tobacco based on SLAF-seq. *Molecular Breeding* **36**:1-12.
- 221 Gong 2016 Jairin, J., T. Kobayashi, Y. Yamagata, S. Sanada-Morimura, K. Mori, K. Tashiro, S. Kuhara, S. Kuwazaki, M. Urio, Y. Suetsugu, K. Yamamoto, M. Matsumura, and H. Yasui. 2013. A Simple Sequence Repeat- and Single-Nucleotide Polymorphism-Based Genetic Linkage Map of the Brown Noddy (*Chroicocephalus ridgwayi*). *Genetics* **194**:111-121.
- 222 Jairin 2013 Kirschner, J., D. Weber, C. Neuschl, A. Franke, M. Bottger, L. Zielke, E. Powalsky, M. Groth, D. Shagin, A. Petzold, N. Hartmann, C. Englert, G. A. Brockmann, M. Platzer, A. Cellerino, and K. Reichwald. 2012. Mapping of quantitative trait loci controlling lifespan in the short-lived fish *Nothobranchius virgatus*. *Genetics* **190**:111-121.
- 223 Kirschner 2012 Ipek, A., K. Yilmaz, P. Sikici, N. A. Tangu, A. T. Oz, M. Bayraktar, M. Ipek, and H. Gulen. 2016. SNP Discovery by GBS in Olive and the Construction of a High-Density Genetic Linkage Map. *Biochemical Genetics* **54**:313-325.
- 224 Ipek 2016 McClelland, E. K., and K. A. Naish. 2008. A genetic linkage map for coho salmon (*Oncorhynchus kisutch*). *Animal Genetics* **39**:169-179.
- 225 McClelland 2008 Guyomard, R., M. Boussaha, F. Krieg, C. Hervet, and E. Quillet. 2012. A synthetic rainbow trout linkage map provides new insights into the salmonid whole genome duplication and the conservation of synteny among teleosts. *Genetics* **190**:111-121.
- 226 Guyomard 2012 Larson, W. A., G. J. McKinney, M. T. Limborg, M. V. Everett, L. W. Seeb, and J. E. Seeb. 2016. Identification of Multiple QTL Hotspots in Sockeye Salmon (*Oncorhynchus nerka*) Using Genotyping-by-Sequencing and a Dense Genetic Linkage Map. *Genetics* **198**:111-121.
- 227 Larson 2016 McKinney, G. J., L. W. Seeb, W. A. Larson, D. Gomez-Uchida, M. T. Limborg, M. S. O. Briauc, M. V. Everett, K. A. Naish, R. K. Waples, and J. E. Seeb. 2016. An integrated linkage map reveals candidate genes underlying adaptive variation in Chinook salmon (*Oncorhynchus tshawytscha*). *Molecular Ecology* **25**:111-121.
- 228 McKinney 2016 Liu, F., F. Sun, J. Li, J. H. Xia, G. Lin, R. J. Tu, and G. H. Yue. 2013. A microsatellite-based linkage map of salt tolerant tilapia (*Oreochromis mossambicus* x *Oreochromis spp.*) and mapping of sex-determining loci. *Bmc Plant Biology* **13**:1-12.
- 229 Liu 2013 Kocher, T. D., W. J. Lee, H. Sobolewska, D. Penman, and B. McAndrew. 1998. A genetic linkage map of a cichlid fish, the tilapia (*Oreochromis mossambicus*). *Genetics* **150**:111-121.
- 230 Kocher 1998 Sternstein, I., M. Reissmann, D. Maj, J. Bieniek, and G. A. Brockmann. 2015. A comprehensive linkage map and QTL map for carcass traits in a cross between Giant Grey and New Zealand White rabbits. *Bmc Genetics* **16**:1-12.
- 231 Sternstein 2015 Luo, X. D., J. Zhao, L. F. Dai, F. T. Zhang, Y. Zhou, Y. Wan, and J. K. Xie. 2016. Linkage map construction and QTL mapping for cold tolerance in *Oryza rufipogon* Griff. at early seedling stage. *Journal of Integrative Agriculture* **15**:111-121.
- 232 Luo 2016 De Leon, T. B., S. Linscombe, and P. K. Subudhi. 2016. Molecular Dissection of Seedling Salinity Tolerance in Rice (*Oryza sativa* L.) Using a High-Density Genetic Linkage Map. *Rice* **9**:1-12.
- 233 DeLeon 2016 Harrang, E., S. Heurtebise, N. Faury, M. Robert, I. Arzul, and S. Lapegue. 2015. Can survival of European flat oysters following experimental infection with *Bonamia ostreae* be predicted using QTLs? *Aquaculture* **448**:521-530.
- 234 Harrang 2015 Johnston, S. E., C. Berenos, J. Slate, and J. M. Pemberton. 2016. Conserved Genetic Architecture Underlying Individual Recombination Rate Variation in a Wild Population of Soay Sheep (*Ovis aries*). *Genetics* **203**:583-+.
- 235 Johnston 2017

- Poissant, J., J. T. Hogg, C. S. Davis, J. M. Miller, J. F. Maddox, and D. W. Coltman. 2010. Genetic linkage map of a wild genome: genomic structure, recombination and sexual dimorphism in bighorn sheep. *Bmc Genomics* **11**.
- 236 Poissant 2010
- Liu, L. L., Y. Q. Wu, Y. W. Wang, and T. Samuels. 2012. A High-Density Simple Sequence Repeat-Based Genetic Linkage Map of Switchgrass. *G3-Winter*, C. B., and A. H. Porter. 2010. AFLP Linkage Map of Hybridizing Swallowtail Butterflies, *Papilio glaucus* and *Papilio canadensis*. *Journal of*
- 237 Liu 2012
- 238 Winter 2010
- Cox, L. A., M. C. Mahaney, J. L. VandeBerg, and J. Rogers. 2006. A second-generation genetic linkage map of the baboon (*Papio hamadryas*) genome. *Journal of Fish Biology* **82**:588-599.
- 239 Cox 2006
- Song, Q. J., G. F. Jia, D. L. Hyten, J. Jenkins, E. Y. Hwang, S. G. Schroeder, J. M. Osorno, J. Schmutz, S. A. Jackson, P. E. McClean, and P. B. Cregan. 2015. SNP Assay Development for Linkage Map Construction, Anchoring Whole-Genome Sequence, and Other Genetic and Genomic Applications in *Physcomitrella patens*. *Plant Journal* **56**:855-866.
- 240 Song 2012
- van Oers, K., A. W. Santure, I. De Cauwer, N. E. M. van Bers, R. Crooijmans, B. C. Sheldon, M. E. Visser, J. Slate, and M. A. M. Groenen. 2014. Replicated high-density genetic maps of two great tit populations reveal fine-scale genomic departures from sex-equal recombination rates. *Heredity* **112**:307-317.
- 241 vanOers 2014
- Wang, S., J. Zhang, W. Jiao, J. Li, X. Xun, Y. Sun, X. Guo, P. Huan, B. Dong, L. Zhang, X. Hu, X. Sun, J. Wang, C. Zhao, Y. Wang, D. Wang, X. Huang, R. Wang, J. Lv, Y. Li, Z. Zhang, B. Liu, W. Lu, Y. Hui, J. Liang, Z. Zhou, R. Hou, X. Li, Y. Liu, H. Li, X. Ning, Y. Lin, L. Zhao, Q. Xing, J. Dou, Y. Li, J. Mao, H. Guo, H. Dou, T. Li, C. Mu, W. Jiang, Q. Fu, X. Fu, Y. Miao, J. Liu, Q. Yu, R. Li, H. Liao, X. Li, Y. Kong, Z. Jiang, D. Chourrout, R. Li, and Z. Bao. 2017. Scallop genome provides insights into evolution of bilaterian karyotype and Baranski, M., G. Gopikrishna, N. A. Robinson, V. K. Katneni, M. S. Shekhar, J. Shanmugakarthik, S. Jothivel, C. Gopal, P. Ravichandran, M. Kent, M. Arnyasi, and A. G. Ponniah. 2014. The Development of a High Density Linkage Map for Black Tiger Shrimp (*Penaeus monodon*) Based on cSNPs. *Plant Genome* **9**.
- 242 Wang 2017
- 243 Baranski 2014
- Punnuri, S. M., J. G. Wallace, J. E. Knoll, K. E. Hyma, S. E. Mitchell, E. S. Buckler, R. K. Varshney, and B. P. Singh. 2016. Development of a High-Density Linkage Map and Tagging Leaf Spot Resistance in Pearl Millet Using Genotyping-by-Sequencing Markers. *Plant Genome* **9**.
- 244 Punnuri 2016
- Kenney-Hunt, J., A. Lewandowski, T. C. Glenn, J. L. Glenn, O. V. Tsyusko, R. J. O'Neill, J. Brown, C. M. Ramsdell, Q. Nguyen, T. Phan, K. R. Shorter, M. J. Dewey, G. Szalai, P. B. Vrana, and M. R. Felder. 2014. A genetic map of *Peromyscus* with chromosomal assignment of linkage groups (a *Peromyscus* *Borrone*, J. W., J. S. Brown, C. L. Tondo, M. Mauro-Herrera, D. N. Kuhn, H. A. Violi, R. T. Sautter, and R. J. Schnell. 2009. An EST-SSR-based linkage map for *Persea americana* Mill. (avocado). *Tree Genetics & Genomes* **5**:553-563.
- 245 Kenney-Hunt 2014
- 246 Borrone 2009
- Bossolini, E., U. Klahre, A. Brandenburg, D. Reinhardt, and C. Kuhlemeier. 2011. High resolution linkage maps of the model organism *Petunia* reveal substantial synteny decay with the related, genome of tomato. *Genome*
- 247 Bossolini 2011
- Malkus, A., Q. Song, P. Cregan, E. Arseniuk, and P. P. Ueng. 2009. Genetic linkage map of *Phaeosphaeria nodorum*, the causal agent of stagonospora *nodorum* blotch disease of wheat. *European Journal of Plant Pathology*
- 248 Malkus 2009
- Gutierrez, M. L., and G. Garcia. 2011. A preliminary linkage map using spotted melanic laboratory strains of the livebearing fish *Phalloceros caudimaculatus* var. *reticulata* (Cyprinodontiformes: Poeciliidae). *Journal of*
- 249 Gutierrez 2011
- Song, Q. J., G. F. Jia, D. L. Hyten, J. Jenkins, E. Y. Hwang, S. G. Schroeder, J. M. Osorno, J. Schmutz, S. A. Jackson, P. E. McClean, and P. B. Cregan. 2015. SNP Assay Development for Linkage Map Construction, Anchoring Whole-Genome Sequence, and Other Genetic and Genomic Applications in *Mathew*, L. S., M. Spannagl, A. Al-Malki, B. George, M. F. Torres, E. K. Al-Dous, E. K. Al-Azwani, E. Hussein, S. Mathew, K. F. X. Mayer, Y. A. Mohamoud, K. Suhre, and J. A. Malek. 2014. A first genetic map of date palm (*Phoenix dactylifera*) reveals long-range genome structure conservation in the *Kamisugi*, Y., M. von Stackelberg, D. Lang, M. Care, R. Reski, S. A. Rensing, and A. C. Cuming. 2008. A sequence-anchored genetic linkage map for the moss, *Physcomitrella patens*. *Plant Journal* **56**:855-866.
- 250 Song 2015
- 251 Mathew 2014
- 252 Kamisugi 2008

- van der Lee, T., A. Testa, A. Robold, J. van 't Klooster, and F. Govers. 2004. High-density genetic linkage maps of *Phytophthora infestans* reveal trisomic progeny and chromosomal rearrangements. *Genetics* **167**:1643-1661.
- 253 vanderLee 2004
- Lind, M., T. Kallman, J. Chen, X. F. Ma, J. Bousquet, M. Morgante, G. Zaina, B. Karlsson, M. Elfstrand, M. Lascoux, and J. Stenlid. 2014. A *Picea abies* Linkage Map Based on SNP Markers Identifies QTLs for Four Aspects of Resistance to *Heterobasidion parviporum* Infection. *Plos One* **9**.
- 254 Lind 2014
- Friedline, C. J., B. M. Lind, E. M. Hobson, D. E. Harwood, A. D. Mix, P. E. Maloney, and A. J. Eckert. 2015. The genetic architecture of local adaptation I: the genomic landscape of foxtail pine (*Pinus balfouriana* Grev. & Balf.) as revealed from a high-density linkage map. *Tree Genetics & Genomes* **11**.
- 255 Friesline 2015
- Yang, H. X., R. Luo, F. C. Zhao, T. Y. Liu, C. X. Liu, and S. W. Huang. 2013. Constructing genetic linkage maps for *Pinus elliottii* var. *elliottii* and *Pinus caribaea* var. *hondurensis* using SRAP, SSR, EST and ISSR markers. *Trees-Chen, M. M., F. J. Feng, X. Sui, M. H. Li, D. Zhao, and S. J. Han.* 2010. Construction of a framework map for *Pinus koraiensis* Sieb. et Zucc. using SRAP, SSR and ISSR markers. *Trees-Structure and Function* **24**:685-693.
- 256 Yang 2013
- 257 Chen 2010
- Jermstad, K. D., A. J. Eckert, J. L. Wegrzyn, A. Delfino-Mix, D. A. Davis, D. C. Burton, and D. B. Neale. 2011. Comparative mapping in *Pinus*: sugar pine (*Pinus lambertiana* Dougl.) and loblolly pine (*Pinus taeda* L.). *Tree Genetics & Chen, W. X., M. Cao, Y. X. Wang, Z. C. Zhou, and L. A. Xu.* 2014. A genetic linkage map of *Pinus massoniana* based on SRAP, SSR and ESTP markers. *Chancerel, E., J. B. Lamy, I. Lesur, C. Noirot, C. Klopp, F. Ehrenmann, C. Boury, G. Le Provost, P. Label, C. Lalanne, V. Leger, F. Salin, J. M. Gion, and C. Plomion.* 2013. High-density linkage mapping in a pine tree reveals a genomic region associated with inbreeding depression and provides clues to Moraga-Suazo, P., L. Orellana, P. Quiroga, C. Balocchi, E. Sanfuentes, R. W. Whetten, R. Hasbun, and S. Valenzuela. 2014. Development of a genetic linkage map for *Pinus radiata* and detection of pitch canker disease resistance associated QTLs. *Trees-Structure and Function* **28**:1823-1835.
- 258 Jermstad 2011
- 259 Chen 2014
- 260 Chancerel 2013
- 261 Moraga-Suazo 2014
- Westbrook, J. W., V. E. Chhatre, L. S. Wu, S. Chamala, L. G. Neves, P. Munoz, P. J. Martinez-Garcia, D. B. Neale, M. Kirst, K. Mockaitis, C. D. Nelson, G. F. Peter, J. M. Davis, and C. S. Echt. 2015. A Consensus Genetic Map for *Pinus taeda* and *Pinus elliottii* and Extent of Linkage Disequilibrium in Two Genotype-Phenotype Discovery Populations of *Pinus taeda*. *G3-Genes Boutet, G., S. A. Carvalho, M. Falque, P. Peterlongo, E. Lhuillier, O. Bouchez, C. Lavaud, M. L. Pilet-Nayel, N. Riviere, and A. Baranger.* 2016. SNP discovery and genetic mapping using genotyping by sequencing of whole genome genomic DNA from a pea RIL population. *Bmc Genomics* **17**.
- 262 Westbrook 2015
- 263 Boutet 2016
- Martinelli, A., P. Hunt, R. Fawcett, P. V. L. Cravo, D. Walliker, and R. Carter. 2005. An AFLP-based genetic linkage map of *Plasmodium chabaudi*
- 264 Martinello 2005
- Jiang, H. Y., N. Li, V. Gopalan, M. M. Zilversmit, S. Varma, V. Nagarajan, J. Li, J. B. Mu, K. Hayton, B. Henschen, M. Yi, R. Stephens, G. McVean, P. Awadalla, T. E. Wellems, and X. Z. Su. 2011. High recombination rates and hotspots in a *Plasmodium falciparum* genetic cross. *Genome Biology* **12**.
- 265 Jiang 2011
- Tripathi, N., M. Hoffmann, E. M. Willing, C. Lanz, D. Weigel, and C. Dreyer. 2009. Genetic linkage map of the guppy, *Poecilia reticulata*, and quantitative trait loci analysis of male size and colour variation. *Proceedings of the Royal Sirvio, A., P. Pamilo, R. A. Johnson, R. E. Page, and J. Gadau.* 2011. ORIGIN AND EVOLUTION OF THE DEPENDENT LINEAGES IN THE GENETIC CASTE DETERMINATION SYSTEM OF POGONOMYRMEX ANTS.
- 266 Tripathi 2009
- 267 Sirvio 2011
- Wang, Y. X., X. Y. Sun, B. Y. Tan, B. Zhang, L. A. Xu, M. R. Huang, and M. X. Wang. 2010. A genetic linkage map of *Populus adenopoda* Maxim. x *P. alba* L. hybrid based on SSR and SRAP markers. *Euphytica* **173**:193-205.
- 268 Wang 2010
- Paolucci, I., M. Gaudet, V. Jorge, I. Beritognolo, S. Terzoli, E. Kuzminsky, R. Muleo, G. S. Mugnozza, and M. Sabatti. 2010. Genetic linkage maps of *Populus alba* L. and comparative mapping analysis of sex determination across *Populus* species. *Tree Genetics & Genomes* **6**:863-875.
- 269 Paolucci 2010
- Mousavi, M., C. F. Tong, F. X. Liu, S. T. Tao, J. Y. Wu, H. G. Li, and J. S. Shi. 2016. De novo SNP discovery and genetic linkage mapping in poplar using restriction site associated DNA and whole-genome sequencing technologies.
- 270 Mousavi 2016

- Gaudet, M., V. Jorge, I. Paolucci, I. Beritognolo, G. S. Mugnozza, and M. Sabatti. 2008. Genetic linkage maps of *Populus nigra* L. including AFLPs, SSRs, SNPs, and sex trait. *Tree Genetics & Genomes* **4**:25-36.
- 271 Gaudet 2008
- Pakull, B., K. Groppe, M. Meyer, T. Markussen, and M. Fladung. 2009. Genetic linkage mapping in aspen (*Populus tremula* L. and *Populus tremuloides* Michx.). *Tree Genetics & Genomes* **5**:505-515.
- 272 Pakull 2009
- Liu, L., J. Li, P. Liu, F. Z. Zhao, B. Q. Gao, and Y. Du. 2012. A genetic linkage map of swimming crab (*Portunus trituberculatus*) based on SSR and AFLP
- 273 Liu 2012
- Feng, C., C. Feng, and M. Kang. 2016. The first genetic linkage map of *Primulina eburnea* (Gesneriaceae) based on EST-derived SNP markers.
- 274 Feng 2016
- Srinivasan, J., W. Sinz, C. Lanz, A. Brand, R. Nandakumar, G. Raddatz, H. Witte, H. Keller, I. Kipping, A. Pires-daSilva, T. Jesse, J. Millare, M. de Both, S. C. Schuster, and R. J. Sommer. 2002. A bacterial artificial chromosome-based genetic linkage map of the nematode *Pristionchus pacificus*. *Genetics*
- 275 Srinivasan 2002
- Lalli, D. A., A. G. Abbott, T. N. Zhebentyayeva, M. L. Badenes, V. Damsteegt, J. Polak, B. Krska, and J. Salava. 2008. A genetic linkage map for an apricot (*Prunus armeniaca* L.) BC(1) population mapping plum pox virus resistance.
- 276 Lalli 2008
- Wang, J., K. C. Zhang, X. M. Zhang, G. H. Yan, Y. Zhou, L. B. Feng, Y. Ni, and X. W. Duan. 2015. Construction of Commercial Sweet Cherry Linkage Maps and QTL Analysis for Trunk Diameter. *Plos One* **10**.
- 277 Wang 2015
- Tavassolian, I., G. Rabiei, D. Gregory, M. Mnejja, M. G. Wirthensohn, P. W. Hunt, J. P. Gibson, C. M. Ford, M. Sedgley, and S. B. Wu. 2010. Construction of an almond linkage map in an Australian population Nonpareil x Lauranne.
- 278 Tavassolian 2010
- Cao, K., L. R. Wang, G. R. Zhu, W. C. Fang, C. W. Chen, and P. Zhao. 2011. Construction of a Linkage Map and Identification of Resistance Gene Analog Markers for Root-knot Nematodes in Wild Peach, *Prunus kansuensis*. *Journal of the American Society for Horticultural Science* **136**:190-197.
- 279 Cao 2011
- Zhang, J., Q. X. Zhang, T. R. Cheng, W. R. Yang, H. T. Pan, J. J. Zhong, L. Huang, and E. Z. Liu. 2015. High-density genetic map construction and identification of a locus controlling weeping trait in an ornamental woody plant (*Prunus mume* Sieb. et Zucc). *DNA Research* **22**:183-191.
- 280 Zhang 2015
- Nunez-Lillo, G., A. Cifuentes-Esquivel, M. Troggio, D. Micheletti, R. Infante, R. Campos-Vargas, A. Orellana, F. Blanco-Herrera, and C. Meneses. 2015. Identification of candidate genes associated with mealiness and maturity date in peach *Prunus persica* (L.) Batsch using QTL analysis and deep
- 281 Nunez-Lillo 2015
- Arango Isaza, R. E., C. Diaz-Trujillo, B. Dhillon, A. Aerts, J. Carlier, C. F. Crane, T. V. de Jong, I. de Vries, R. Dietrich, A. D. Farmer, C. F. Ferreira, S. Garcia, M. Guzman, R. C. Hamelin, E. A. Lindquist, R. Mehrabi, O. Quiros, J. Schmutz, H. Shapiro, E. Reynolds, G. Scalliet, M. Souza, Jr., I. Stergiopoulos, T. A. J. Van der Lee, P. J. G. M. De Wit, M.-F. Zapater, L.-H. Zwiars, I. V. Grigoriev, S. B. Goodwin, and G. H. J. Kema. 2016. Combating a Global Threat to a Clonal Crop: Banana Black Sigatoka Pathogen *Pseudocercospora*
- 282 Arango\_Isaza 2016
- Sarkhosh, A., Z. Zamani, R. Fatahi, C. Wiedow, D. Chagne, and S. E. Gardiner. 2012. A pomegranate (*Punica granatum* L.) linkage map based on AFLP markers. *Journal of Horticultural Science & Biotechnology* **87**:1-6.
- 283 Harel-Beja 2015
- Wu, J., L. T. Li, M. Li, M. A. Khan, X. G. Li, H. Chen, H. Yin, and S. L. Zhang. 2014. High-density genetic linkage map construction and identification of fruit-related QTLs in pear using SNP and SSR markers. *Journal of Experimental*
- 284 Wu 2014
- Bodenes, C., E. Chancerel, F. Ehrenmann, A. Kremer, and C. Plomion. 2016. High-density linkage mapping and distribution of segregation distortion regions in the oak genome. *DNA Research* **23**:115-124.
- 285 Bodenes 2016
- Cano, J. M., M. H. Li, A. Laurila, J. Vilkki, and J. Merila. 2011. First-generation linkage map for the common frog *Rana temporaria* reveals sex-linkage group.
- 286 Cano 2011
- Mun, J. H., H. Chung, W. H. Chung, M. Oh, Y. M. Jeong, N. Kim, B. O. Ahn, B. S. Park, S. Park, K. B. Lim, Y. J. Hwang, and H. J. Yu. 2015. Construction of a reference genetic map of *Raphanus sativus* based on genotyping by
- 287 Mun 2015
- whole-genome resequencing. *Theoretical and Applied Genetics* **128**:259-272.



- Steen, R. G., A. E. Kwikteck-Black, C. Glenn, J. Gullings-Handley, W. Van Etten, O. S. Atkinson, D. Appel, S. Twigger, M. Muir, T. Mull, M. Granados, M. Kissebah, K. Russo, R. Crane, M. Popp, M. Peden, T. Matise, D. M. Brown, J. Lu, S. Kingsmore, P. J. Tonellato, S. Rozen, D. Slonim, P. Young, M. Knoblauch, A. Provoost, D. Ganten, S. D. Colman, J. Rothberg, E. S. Lander, and H. J. Jacob. 1999. A high-density integrated genetic linkage and radiation
- 288 Steen 1999 Schlipalius, D. I., Q. Cheng, P. E. B. Reilly, P. J. Collins, and P. R. Ebert. 2002. Genetic linkage analysis of the lesser grain borer *Rhyzopertha dominica* identifies two loci that confer high-level resistance to the fumigant
- 289 Schlipallus 2002 Rukam, S. T., M. V. Parakhia, J. R. Thakkar, V. M. Rathod, S. M. Padhiyar, V. D. Thummar, H. Dalal, V. V. Kothari, J. V. Kheni, R. M. Dhingani, and B. A. Golakiya. 2016. Development of linkage map and identification of QTLs
- 290 Rukam 2016 responsible for fusarium wilt resistance in castor (*Ricinus communis* L.). Ward, J. A., J. Bhangoo, F. Fernandez-Fernandez, P. Moore, J. D. Swanson, R. Viola, R. Velasco, N. Bassil, C. A. Weber, and D. J. Sargent. 2013. Saturated linkage map construction in *Rubus idaeus* using genotyping by
- 291 Ward 2013 sequencing and genome-independent imputation. *Bmc Genomics* **14**. Bushakra, J. M., M. J. Stephens, A. N. Atmadjaja, K. S. Lewers, V. V. Symonds, J. A. Udall, D. Chagne, E. J. Buck, and S. E. Gardiner. 2012. Construction of black (*Rubus occidentalis*) and red (*R. idaeus*) raspberry
- 292 Bushakra 2012 linkage maps and their comparison to the genomes of strawberry, apple, and Nie, H., X. Yan, Z. Huo, L. Jiang, P. Chen, H. Liu, J. Ding, and F. Yang. 2017. Construction of a High-Density Genetic Map and Quantitative Trait Locus
- 293 Nie 2017 Mapping in the Manila clam *Ruditapes philippinarum*. *Scientific Reports* Zhang, N., L. N. Zhang, Y. Tao, L. Guo, J. Sun, X. Li, N. Zhao, J. Peng, X. J. Li, L. Zeng, J. S. Chen, and G. P. Yang. 2015. Construction of a high density SNP linkage map of kelp (*Saccharina japonica*) by sequencing Taq I site
- 294 Zhang 2015 associated DNA and mapping of a sex determining locus. *Bmc Genomics* **16**. Tsai, H. Y., D. Robledo, N. R. Lowe, M. Bekaert, J. B. Taggart, J. E. Bron, and R. D. Houston. 2016. Construction and Annotation of a High Density SNP
- 295 Tsai 2016 Linkage Map of the Atlantic Salmon (*Salmo salar*) Genome. *G3-Genes* Leitwein, M., B. Guinand, J. Pouzadoux, E. Desmarais, P. Berrebi, and P.-A. Gagnaire. 2017. A Dense Brown Trout (*Salmo trutta*) Linkage Map Reveals Recent Chromosomal Rearrangements in the
- 296 Leitwein 2017 *Salmo* Genus and the Impact of Selection on Linked Neutral Liu, T., L. L. Guo, Y. L. Pan, Q. Zhao, J. H. Wang, and Z. Q. Song. 2016. Construction of the first high-density genetic linkage map of *Salvia miltiorrhiza*
- 297 Liu 2016 using specific length amplified fragment (SLAF) sequencing. *Scientific Criscione, C. D., C. L. L. Valentim, H. Hirai, P. T. LoVerde, and T. J. C.*
- 298 Criscione 2009 Anderson. 2009. Genomic linkage map of the human blood fluke *Schistosoma* Hollenbeck, C. M., D. S. Portnoy, and J. R. Gold. 2015. A genetic linkage map of red drum (*Sciaenops ocellatus*) and comparison of chromosomal syntenies
- 299 Hollenbeck 2015 with four other fish species. *Aquaculture* **435**:265-274. Shen, X. Y., H. Y. Kwan, N. M. Thevasagayam, S. R. S. Prakki, I. S. Kuznetsova, S. Y. Ngoh, Z. Lim, F. Feng, A. Chang, and L. Orban. 2014. The
- 300 Shen 2014 first transcriptome and genetic linkage map for Asian arowana. *Molecular Wang, W. J., Y. L. Hu, Y. Ma, L. Y. Xu, J. T. Guan, and J. Kong. 2015. High-Density Genetic Linkage Mapping in Turbot (*Scophthalmus maximus* L.)*
- 301 Wang 2015 Based on SNP Markers and Major Sex- and Growth-Related Regions Ma, H. Y., S. J. Li, N. N. Feng, C. Y. Ma, W. Wang, W. Chen, and L. B. Ma. 2016. First genetic linkage map for the mud crab (*Scylla paramamosain*)
- 302 Ma 2016 constructed using microsatellite and AFLP markers. *Genetics and Molecular Milczarski, P., M. Hanek, M. Tyrka, and S. Stojalowski. 2016. The application of GBS markers for extending the dense genetic map of rye (*Secale cereale* L.) and the localization of the Rfc1 gene restoring male fertility in plants with the C source of sterility-inducing cytoplasm. *Journal of Applied Genetics**
- 303 Milczarski 2015 Aoki, J., W. Kai, Y. Kawabata, A. Ozaki, K. Yoshida, T. Koyama, T. Sakamoto, and K. Araki. 2015. Second generation physical and linkage maps
- 304 Aoki 2015 of yellowtail (*Seriola quinqueradiata*) and comparison of synteny with four

- Zhang, H. Y., H. M. Miao, C. Li, L. B. Wei, Y. H. Duan, Q. Ma, J. J. Kong, F. F. Xu, and S. X. Chang. 2016. Ultra-dense SNP genetic map construction and identification of SiDt gene controlling the determinate growth habit in
- 305 Zhang 2016 Fang, X. M., K. J. Dong, X. Q. Wang, T. P. Liu, J. H. He, R. Y. Ren, L. Zhang, R. Liu, X. Y. Liu, M. Li, M. Z. Huang, Z. S. Zhang, and T. Y. Yang. 2016. A high density genetic map and QTL for agronomic and yield traits in Foxtail
- 306 Fang 2016 Bergero, R., S. Qiu, A. Forrest, H. Borthwick, and D. Charlesworth. 2013. Expansion of the Pseudo-autosomal Region and Ongoing Recombination
- 307 Bergero 2013 Suppression in the *Silene latifolia* Sex Chromosomes. *Genetics* **194**:673-+.
- Javidfar, F., and B. F. Cheng. 2013. Construction of a genetic linkage map and QTL analysis of erucic acid content and glucosinolate components in
- 308 Javidfar 2013 yellow mustard (*Sinapis alba* L.). *Bmc Plant Biology* **13**.
- Viquez-Zamora, M., M. Caro, R. Finkers, Y. Tikunov, A. Bovy, R. G. F. Visser, Y. L. Bai, and S. van Heusden. 2014. Mapping in the era of sequencing: high
- 309 Viquez-Zamora 2014 density genotyping and its application for mapping TYLCV resistance in
- Fukuoka, H., K. Miyatake, T. Nunome, S. Negoro, K. Shirasawa, S. Isobe, E. Asamizu, H. Yamaguchi, and A. Ohyama. 2012. Development of gene-based
- 310 Fukuoka 2012 markers and construction of an integrated linkage map in eggplant by using
- Solanum orthologous (SOL) gene sets. *Theoretical and Applied Genetics*
- van den Oever-van den Elsen, F., A. F. Lucatti, S. van Heusden, C. Broekgaarden, R. Mumm, M. Dicke, and B. Vosman. 2016. Quantitative
- 311 vandenOever-vandenElsen 2016 resistance against *Bemisia tabaci* in *Solanum pennellii*: Genetics and
- Chen, A. L., C. Y. Liu, C. H. Chen, J. F. Wang, Y. C. Liao, C. H. Chang, M. H. Tsai, K. K. Hwu, and K. Y. Chen. 2014. Reassessment of QTLs for Late Blight
- 312 Chen 2014 Resistance in the Tomato Accession L3708 Using a Restriction Site
- Associated DNA (RAD) Linkage Map and Highly Aggressive Isolates of
- Endelman, J. B., and S. H. Jansky. 2016. Genetic mapping with an inbred line-
- 313 Endelman 2016 derived F2 population in potato. *Theoretical and Applied Genetics* **129**:935-
- Ji, G. S., Q. J. Zhang, R. H. Du, P. Lv, X. Ma, S. Fan, S. Y. Li, S. L. Hou, Y. C. Han, and G. Q. Liu. 2017. Construction of a high-density genetic map using
- 314 Ji 2017 specific-locus amplified fragments in sorghum. *Bmc Genomics* **18**.
- Palaiokostas, C., S. Ferraresso, R. Franch, R. D. Houston, and L. Bargelloni. 2016. Genomic Prediction of Resistance to Pasteurellosis in Gilthead Sea
- 315 Palaiokostas 2016 Bream (*Sparus aurata*) Using 2b-RAD Sequencing. *G3-Genes Genomes*
- Chan-Navarrete, R., O. Dolstra, M. van Kaauwen, E. T. L. van Bueren, and C. G. van der Linden. 2016. Genetic map construction and QTL analysis of
- 316 Chan-Navarrete 2016 nitrogen use efficiency in spinach (*Spinacia oleracea* L.). *Euphytica* **208**:621-
- Nemetschke, L., A. G. Eberhardt, M. E. Viney, and A. Streit. 2010. A genetic
- 317 Nemetschke 2010 map of the animal-parasitic nematode *Strongyloides ratti*. *Molecular and*
- Tortereau, F., B. Servin, L. Frantz, H. J. Megens, D. Milan, G. Rohrer, R. Wiedmann, J. Beever, A. L. Archibald, L. B. Schook, and M. A. M. Groenen. 2012. A high density recombination map of the pig reveals a correlation
- 318 Tortereau 2012 between sex-specific recombination and GC content. *Bmc Genomics* **13**.
- Backstrom, N., W. Forstmeier, H. Schielzeth, H. Mellenius, K. Nam, E. Bolund, M. T. Webster, T. Ost, M. Schneider, B. Kempnaers, and H.
- 319 Backstrom 2010 Ellegren. 2010. The recombination landscape of the zebra finch *Taeniopygia*
- Kai, W., K. Kikuchi, S. Tohari, A. K. Chew, A. Tay, A. Fujiwara, S. Hosoya, H. Suetake, K. Naruse, S. Brenner, Y. Suzuki, and B. Venkatesh. 2011. Integration of the Genetic Map and Genome Assembly of Fugu Facilitates
- 320 Kai 2005 Insights into Distinct Features of Genome Evolution in Teleosts and
- Arias, M., M. Hernandez, N. Remondegui, K. Huvenaars, P. van Dijk, and E. Ritter. 2016. First genetic linkage map of *Taraxacum koksaghyz* Rodin based
- 321 Arias 2016 on AFLP, SSR, COS and EST-SSR markers. *Scientific Reports* **6**.
- Royaert, S., J. Jansen, D. V. da Silva, S. M. D. Branco, D. S. Livingstone, G. Mustiga, J. P. Marelli, I. S. Araujo, R. X. Correa, and J. C. Motamayor. 2016. Identification of candidate genes involved in Witches' broom disease
- 322 Royaert 2016 resistance in a segregating mapping population of *Theobroma cacao* L. in

- Uchino, T., Y. Nakamura, M. Sekino, W. Kai, A. Fujiwara, M. Yasuike, T. Sugaya, H. Fukuda, M. Sano, and T. Sakamoto. 2016. Constructing Genetic Linkage Maps Using the Whole Genome Sequence of Pacific Bluefin Tuna (*Thunnus orientalis*) and a Comparison of Chromosome Structure among Teleost Species. *Advances in Bioscience and Biotechnology*
- 323 Uchino 2016
- Foley, B. R., C. G. Rose, D. E. Rundle, W. Leong, G. W. Moy, R. S. Burton, and S. Edmands. 2011. A gene-based SNP resource and linkage map for the copepod *Tigriopus californicus*. *Bmc Genomics* **12**.
- 324 Foley 2011
- Lorenzen, M. D., Z. Doyungan, J. Savard, K. Snow, L. R. Crumly, T. D. Shippy, J. J. Stuart, S. J. Brown, and R. W. Beeman. 2005. Genetic linkage maps of the red hour beetle, *Tribolium castaneum*, based on bacterial artificial chromosomes and expressed sequence tags. *Genetics* **170**:741-747.
- 325 Lorenzen 2005
- Yezereski, A., L. Stevens, and J. Ametrano. 2003. A genetic linkage map for *Tribolium confusum* based on random amplified polymorphic DNAs and recombinant inbred lines. *Insect Molecular Biology* **12**:517-526.
- 326 Yezereski 2003
- Laurent, V., E. Wajnberg, B. Mangin, T. Schiex, C. Gaspin, and F. Vanlerberghe-Masutti. 1998. A composite genetic map of the parasitoid wasp *Trichogramma brassicae* based on RAPD markers. *Genetics* **150**:275-282.
- 327 Laurent 1998
- Hirakawa, H., P. Kaur, K. Shirasawa, P. Nichols, S. Nagano, R. Appels, W. Erskine, and S. N. Isobe. 2016. Draft genome sequence of subterranean clover, a reference for genus *Trifolium*. *Scientific Reports* **6**.
- 328 Hirakawa 2016
- Griffiths, A. G., B. A. Barrett, D. Simon, A. K. Khan, P. Bickerstaff, C. B. Anderson, B. K. Franzmayr, K. R. Hancock, and C. S. Jones. 2013. An integrated genetic linkage map for white clover (*Trifolium repens* L.) with
- 329 Griffiths 2013
- Ghamkhar, K., S. Isobe, P. G. H. Nichols, T. Faithfull, M. H. Ryan, R. Snowball, S. Sato, and R. Appels. 2012. The first genetic maps for subterranean clover (*Trifolium subterraneum* L.) and comparative genomics with *T. pratense* L. and *Medicago truncatula* Gaertn. to identify new molecular
- 330 Ghamkhar 2012
- Zhai, H. J., Z. Y. Feng, J. Li, X. Y. Liu, S. H. Xiao, Z. F. Ni, and Q. X. Sun. 2016. QTL Analysis of Spike Morphological Traits and Plant Height in Winter
- 331 Zhai 2016
- Wheat (*Triticum aestivum* L.) Using a High-Density SNP and SSR-Based
- MacLeod, A., A. Tweedie, S. McLellan, S. Taylor, N. Hall, M. Berriman, N. M. El-Sayed, M. Hope, C. M. R. Turner, and A. Tait. 2005. The genetic map and comparative analysis with the physical map of *Trypanosoma brucei*. *Nucleic*
- 332 MacLeod 2005
- Shan, T. F., S. J. Pang, J. Li, X. Li, and L. Su. 2015. Construction of a high-density genetic map and mapping of a sex-linked locus for the brown alga *Undaria pinnatifida* (Phaeophyceae) based on large scale marker
- 333 Shan 2015
- development by specific length amplified fragment (SLAF) sequencing. *Bmc*
- McCallum, S., J. Graham, L. Jorgensen, L. J. Rowland, N. V. Bassil, J. F. Hancock, E. J. Wheeler, K. Vining, J. A. Poland, J. W. Olmstead, E. Buck, C. Wiedow, E. Jackson, A. Brown, and C. A. Hackett. 2016. Construction of a
- 334 McCallum 2016
- SNP and SSR linkage map in autotetraploid blueberry using genotyping by
- Covarrubias-Pazaran, G., L. Diaz-Garcia, B. Schlautman, J. Deutsch, W. Salazar, M. Hernandez-Ochoa, E. Grygleski, S. Steffan, M. Iorizzo, J. Polashock, N. Vorsa, and J. Zalapa. 2016. Exploiting genotyping by
- 335 Covarrubias-Pazaran 2016
- sequencing to characterize the genomic structure of the American cranberry
- Lepers-Andrzejewski, S., S. Causse, B. Caromel, M. Wong, and M. Dron. 2012. Genetic Linkage Map and Diversity Analysis of Tahitian Vanilla (*Vanilla*
- 336 Lepers-Andrzejewski 2012
- xtahitensis*, Orchidaceae). *Crop Science* **52**:795-806.
- Sirvio, A., J. S. Johnston, T. Wenseleers, and P. Pamilo. 2011. A high
- 337 Sirvio 2011
- recombination rate in eusocial Hymenoptera: evidence from the common
- Kaur, S., R. B. E. Kimber, N. O. I. Cogan, M. Materne, J. W. Forster, and J. G. Paull. 2014. SNP discovery and high-density genetic mapping in faba bean
- 338 Kaur 2014
- (*Vicia faba* L.) permits identification of QTLs for ascochyta blight resistance.
- Liu, C. Y., B. J. Fan, Z. M. Cao, Q. Z. Su, Y. Wang, Z. X. Zhang, and J. Tian. 2016. Development of a high-density genetic linkage map and identification of
- 339 Liu 2016
- flowering time QTLs in adzuki bean (*Vigna angularis*). *Scientific Reports* **6**.
- Gupta, S. K., J. Souframanien, and T. Gopalakrishna. 2008. Construction of a
- 340 Gupta 2008
- genetic linkage map of black gram, *Vigna mungo* (L.) Hepper, based on molecular markers and comparative studies. *Genome* **51**:628-637.

- Wang, L. X., C. S. Wu, M. Zhong, D. Zhao, L. Mei, H. L. Chen, S. H. Wang, C. J. Liu, and X. Z. Cheng. 2016. Construction of an integrated map and location of a bruchid resistance gene in mung bean. *Crop Journal* **4**:360-366.
- 341 Wang 2016
- Kongjaimun, A., A. Kaga, N. Tomooka, P. Somta, T. Shimizu, Y. J. Shu, T. Isemura, D. A. Vaughan, and P. Srinives. 2012. An SSR-based linkage map of yardlong bean (*Vigna unguiculata* (L.) Walp. subsp. *unguiculata* Sesquipedalis Group) and QTL analysis of pod length. *Genome* **55**:81-92.
- 342 Kongjaimun 2012
- Marubodee, R., E. Ogiso-Tanaka, T. Isemura, S. Chankaew, A. Kaga, K. Naito, H. Ehara, and N. Tomooka. 2015. Construction of an SSR and RAD-Marker Based Molecular Linkage Map of *Vigna vexillata* (L.) A. Rich. *Plos Liu, Z. D., X. W. Guo, Y. S. Guo, H. Lin, P. X. Zhang, Y. H. Zhao, K. Li, and C. X. Li. 2013. SSR AND SRAP MARKER BASED LINKAGE MAP OF VITIS AMURENSIS RUPR. Pakistan Journal of Botany* **45**:191-195.
- 343 Marubodee 2015
- Liu 2013
- Zhang, J. K., L. Hausmann, R. Eibach, L. J. Welter, R. Topfer, and E. M. Zyprian. 2009. A framework map from grapevine V3125 (*Vitis vinifera* 'Schiava grossa' x 'Riesling') x rootstock cultivar 'Borner' (*Vitis riparia* x *Vitis cinerea*) to localize genetic determinants of phylloxera root resistance.
- 344 Liu 2013
- Zhang 2009
- Zhang, Y. S., G. L. Shi, Z. D. Liu, Y. H. Zhao, X. X. Yang, J. C. Zhu, K. Li, and X. W. Guo. 2015. Using specific length amplified fragment sequencing to construct the high-density genetic map for *Vitis* (*Vitis vinifera* L. x *Vitis Wells, D. E., L. Gutierrez, Z. Xu, V. Krylov, J. Macha, K. P. Blankenburg, M. Hitchens, L. J. Bellot, M. Spivey, D. L. Stemple, A. Kowis, Y. Ye, S. Pasternak, J. Owen, T. Tran, R. Slavikova, L. Tumova, T. Tlapakova, E. Seifertova, S. E. Scherer, and A. K. Sater. 2011. A genetic map of *Xenopus Amores, A., J. Catchen, I. Nanda, W. Warren, R. Walter, M. Scharfl, and J. H. Postlethwait. 2014. A RAD-Tag Genetic Map for the Platyfish (*Xiphophorus maculatus*) Reveals Mechanisms of Karyotype Evolution Among Teleost Fish. Zhou, Z. Q., C. S. Zhang, Y. Zhou, Z. F. Hao, Z. H. Wang, X. Zeng, H. Di, M. S. Li, D. G. Zhang, H. J. Yong, S. H. Zhang, J. F. Weng, and X. H. Li. 2016. Genetic dissection of maize plant architecture with an ultra-high density bin map based on recombinant inbred lines. *Bmc Genomics* **17**.**
- 345 Zhang 2009
- 346 Guo 2015
- 347 Wells 2011
- 348 Amores 2014
- Zhou 2016
- Zhang, Z., T. Wei, Y. Zhong, X. Li, and J. Huang. 2016. Construction of a high-density genetic map of *Ziziphus jujuba* Mill. using genotyping by sequencing technology. *Tree Genetics & Genomes* **12**.
- 349 Zhou 2016
- 350 Zhang 2016
- Wang, F. F., R. Singh, A. D. Genovesi, C. M. Wai, X. E. Huang, A. Chandra, and Q. Y. Yu. 2015. Sequence-tagged high-density genetic maps of *Zoysia japonica* provide insights into genome evolution in Chloridoideae. *Plant Huang, X. E., F. F. Wang, R. Singh, J. A. Reinert, M. C. Engelke, A. D. Genovesi, A. Chandra, and Q. Y. Yu. 2016. Construction of high-resolution genetic maps of *Zoysia matrella* (L.) Merrill and applications to comparative genomic analysis and QTL mapping of resistance to fall armyworm. *Bmc Lendenmann, M. H., D. Croll, E. L. Stewart, and B. A. McDonald. 2014. Quantitative Trait Locus Mapping of Melanization in the Plant Pathogenic Fungus *Zymoseptoria tritici*. *G3-Genes Genomes Genetics* **4**:2519-2533.**
- 351 Wang 2015
- 352 Huang 2016
- 353 Lendenmann 2014
